# 1 Genome-wide association study between SARS-CoV-2 single 2 nucleotide polymorphisms and virus copies during infections

3  
4 Ke Li<sup>1,2,#</sup>, Chrispin Chaguza<sup>1,2</sup>, Yi Ting Chew<sup>1,2</sup>, Nicholas F.G. Chen<sup>1</sup>, David Ferguson<sup>3,4</sup>, Sameer  
5 Pandya<sup>3,4</sup>, Nick Kerantzas<sup>3,4</sup>, Wade Schulz<sup>3,4</sup>, Yale SARS-CoV-2 Genomic Surveillance Initiative\*,  
6 Anne M. Hahn<sup>1</sup>, Virginia E. Pitzer<sup>1,2</sup>, Daniel M. Weinberger<sup>1,2</sup>, Nathan D. Grubaugh<sup>1,2,5,#</sup>

7  
8 <sup>1</sup> Department of Epidemiology of Microbial Diseases, Yale School of Public Health, New Haven, CT, USA

9 <sup>2</sup> Public Health Modeling Unit, Yale School of Public Health, New Haven, CT, USA

10 <sup>3</sup> Department of Laboratory Medicine, Yale School of Medicine, New Haven, CT, USA

11 <sup>4</sup> Yale Center for Genome Analysis, Yale University, New Haven, CT, USA

12 <sup>5</sup> Department of Ecology and Evolutionary Biology, Yale University, New Haven, CT, USA

13 \* Authors listed at the end of the manuscript

14 # corresponding authors: [ke.li.kl662@yale.edu](mailto:ke.li.kl662@yale.edu); [nathan.grubaugh@yale.edu](mailto:nathan.grubaugh@yale.edu)

## 15 Abstract

16 Variations in viral loads generated during SARS-CoV-2 infections can influence COVID-19  
17 disease progression and the likelihood of onward transmission. However, the host and virus  
18 factors that may impact viral loads and infection dynamics are not fully understood. Here, we  
19 conducted virus whole genome sequencing and measured viral copies using RT-qPCR from  
20 9,902 SARS-CoV-2 infections over a 2-year period to examine the relative impact of host  
21 factors and virus genetic variation on changes in viral copies. We first used statistical  
22 regression models to show that host age and SARS-CoV-2 variant significantly impact viral  
23 copies, but vaccination status does not. Then, using a genome-wide association study  
24 (GWAS) approach, we identified multiple nucleotide substitutions corresponding to amino  
25 acid changes in the SARS-CoV-2 genome associated with variations in viral copies. In  
26 particular, we analyzed the temporal patterns and found that SNPs associated with higher  
27 viral copies were predominantly observed in Omicron BA.2/BA.4/BA.5/XBB infections,  
28 whereas those associated with decreased viral copies were mostly observed in infections  
29 with Delta and Omicron BA.1 variants. Our work showcases how GWAS can be a useful tool  
30 for probing phenotypes related to SNPs in viral genomes, which can be used to characterize  
31 emerging variants and monitor therapeutic interventions.

## 33 Introduction

34 Continued SARS-CoV-2 transmission and evolution has propelled the COVID-19 pandemic.  
35 Peak viral replication in the upper respiratory tract occurs during the first few days of infection  
36 [1]. The viral load (or copies measured by RT-qPCR) in patient samples can be used to infer  
37 the likelihood of transmission, and a strong relationship between SARS-CoV-2 transmission  
38 and viral load has been reported [2]. However, it is challenging to predict the transmission  
39 potential of SARS-CoV-2 infections using individual viral load alone, which limits our  
40 understanding of the intrinsic transmissibility of the virus at the population level [3–5]. The  
41 challenge often arises from large variations in viral load dynamic in sampled cases, which can  
42 be associated with 1) host heterogeneity, e.g., age [3] and vaccination status [6–8]; 2) distinct  
43 inherent properties of virus variants or sublineages [9], and 3) different sampling times [10].

44 For example, sampling during the early stages of infection may yield higher viral loads  
45 compared to later stages when viral replication has reached its peak. Nevertheless, the

NOTE: This preprint reports new research that has not been certified by peer review and should not be used to guide clinical practice.

46 relative importance of these factors influencing viral load has not been completely explored  
47 [11,12].

48

49 Genome-wide association studies (GWAS) have emerged as a useful tool in the field of  
50 genetics, providing an approach to unraveling the complex interplay between genetic  
51 variations and observable traits, including diseases and drug resistance, as reviewed in [13].  
52 Through testing hundreds of thousands of genetic variants across many genomes, GWAS  
53 analysis enables us to identify specific mutations or genes in humans that contribute  
54 significantly to observed phenotypic variations, such as HIV1-load [14]. Several studies have  
55 employed GWAS analysis to identify and investigate the association between human genetic  
56 variations across different individuals and the severity of COVID-19, shedding light on genetic  
57 variations that are related to severe infections [15–17]. Although GWAS was originally  
58 developed for humans, recently, it's been increasingly adapted and applied to study the  
59 genetic basis of several microbial traits [18], especially for bacteria. Although there are studies  
60 utilizing a GWAS method to validate the association between the viral genome and HIV drug  
61 resistance [19], and to study the effect of human immunity on hepatitis C virus [20], the  
62 application of GWAS analysis to study viral genomes and examine the association between  
63 viral mutations and related phenotypes is limited. The confluence of the extensive existing  
64 research on SARS-CoV-2 mutations and the millions of infections that have been sequenced  
65 provides us the opportunity to evaluate the application of GWAS for viral genomics. The  
66 hypothesis-free approach has the potential to enhance our understanding of genetic  
67 determinants influencing viral fitness and evolution and further inform effective public health  
68 strategies aimed at mitigating the spread and impact of SARS-CoV-2.

69

70 In this work, we aim to investigate the relative impact of host factors and intrinsic viral genetic  
71 mutations (single nucleotide polymorphisms, SNPs) on the changes in viral copies. For this,  
72 we apply a viral GWAS analysis to SARS-CoV-2 genomic sequencing and standardized RT-  
73 qPCR data collected from the Yale New Haven Hospital from February 2021 to March 2023.  
74 Further, the availability of the whole genome sequencing data on SARS-CoV-2 infections with  
75 the relevant laboratory and patient metadata allows the identification of the association  
76 between viral mutations and viral copies for different variants of concern (VOCs). We then  
77 examine the temporal pattern of identified mutations by constructing a phylogenetic tree,  
78 drawing upon subsamples, and analyzing the time series of the fraction of mutations  
79 occurring in the sequences. Finally, we compare whether the temporal pattern is consistent  
80 across different gene segments. This multifaceted analysis contributes to unraveling the  
81 complex dynamics of SARS-CoV-2 infections, providing valuable insights into the underlying  
82 viral mutations that influence viral copies in different VOCs.

## 83 Results

### 84 Viral copies vary in SARS-CoV-2 infections

85 To better understand how SARS-CoV-2 viral load varies in infected individuals, we analyzed  
86 the viral copy data, along with associated host metadata (i.e., age and vaccination status),  
87 and genome sequencing data from a cohort of patients tested at the Yale New Haven  
88 Hospital (YNHH) located in Connecticut, US. We selected 9902 whole genome sequences  
89 with available viral copy data generated from remnant SARS-CoV-2 diagnostic samples over  
90 a 2-year period, from 03-Feb-2021 to 21-Mar-2023 (**Fig. 1A**). The VOCs that we identified in

91 our dataset during the sampling period included Alpha ( $n = 809$ ), Delta ( $n = 1278$ ), Gamma ( $n = 36$ ), BA.1 ( $n = 1818$ ), BA.2 ( $n = 2432$ ), BA.4 ( $n = 293$ ), BA.5 ( $n = 1992$ ), XBB ( $n = 698$ ), and  
92 the pre-VOC variant (named 'Other',  $n = 546$ ). We conducted RT-qPCR using a standardized  
93 assay targeting the nucleocapsid (CDC 'N1' primers) for each sample to allow for cross-  
94 sample comparisons [21], except for a period during October 2021 when the PCR data were  
95 not generated. Across all samples, the viral copies, expressed as  $\log_{10}$ (viral copies per  
96 milliliter (Genome Equivalents/ml)), exhibited variations, ranging from 3.60 to 10.55, with a  
97 median value of 7.26 (**Fig. 1B**). The variations in viral copies could be attributed either to the  
98 introduction and/or replacement of different VOCs, each with its own epidemic curve, or to  
99 the stochasticity from the sampling process. To reduce stochastic effects, we aggregated  
100 the viral copies by month and still observed large variations in the viral copies across the  
101 months (**Fig. 1C**). Notably, we observed the lowest median value of viral copies (median =  
102 6.49) in February 2022, during which 96.3% of the sampled sequences tested positive for  
103 BA.1 infections. By contrast, we observed the highest median value of viral copies (median =  
104 7.70) in June 2022, during which the sampled sequences tested positive for BA.2 (64.9%),  
105 BA.4 (6%), or BA.5 (29.1%) infections. Taken together, we showed a wide range of viral  
106 copies in the sampled SARS-CoV-2 infections with different VOCs, utilizing data from  
107 genomic surveillance and standardized RT-qPCR tests.  
108  
109

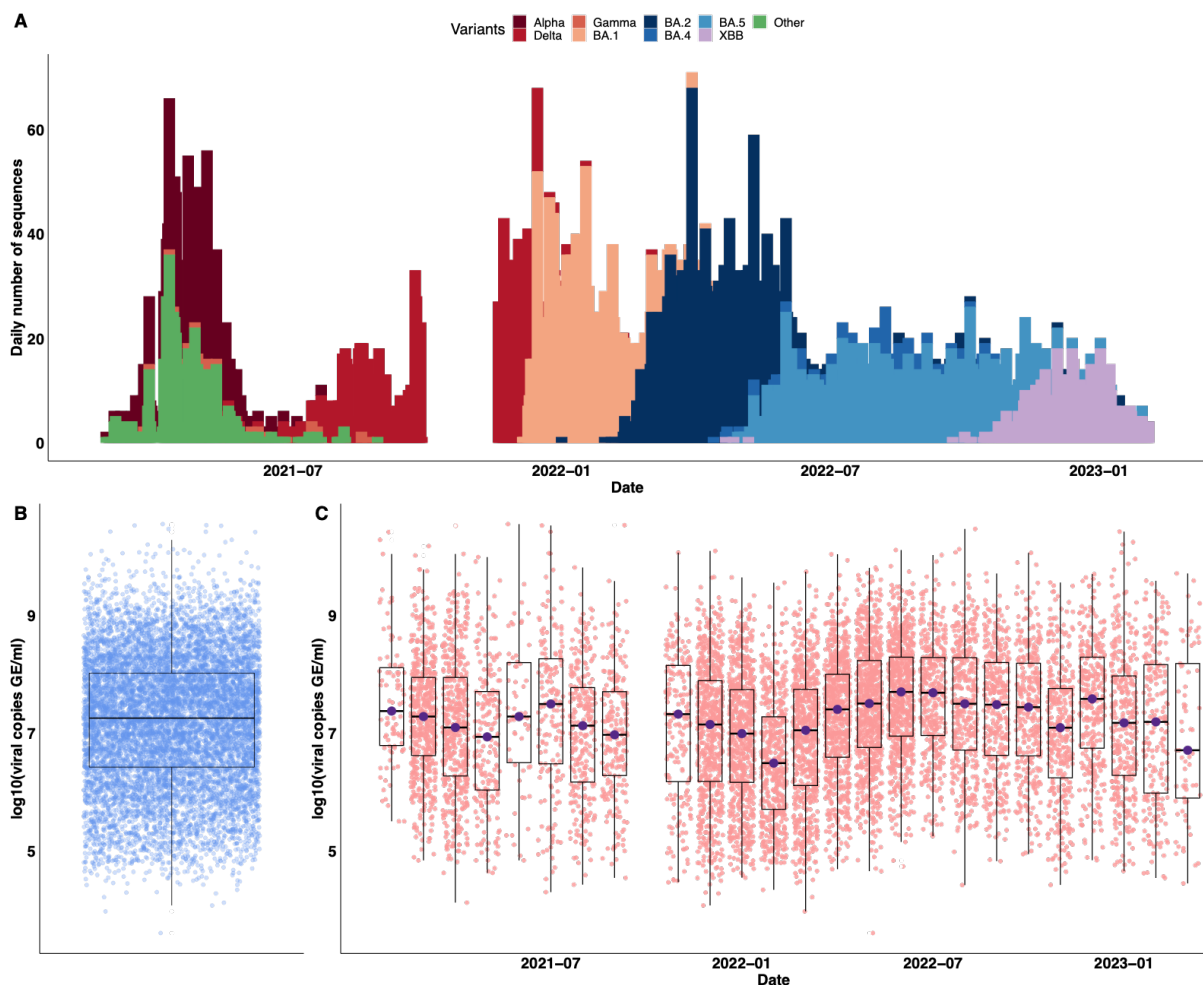

110  
111 **Figure 1. Genomic sequences of SARS-CoV-2 infections and associated viral copies from cross-**  
112 **sectional samples collected in Connecticut, US. (A)** The daily number of genomic sequences of  
113 SARS-CoV-2 VOCs from February 2021 to March 2023. **(B)** The summary of viral copies of all samples,  
114 expressed as  $\log_{10}$ (viral copies per milliliter). **(C)** The summary of viral copies aggregated by month.

115 The data gap in October 2021 is because we were unable to conduct PCR to obtain viral copies during  
116 this time.

## 117 Viral copies correlate with age and variants, but not with vaccination 118 status

119 Having uncovered a large variability in the observed viral copies from the samples, we next  
120 assessed whether host factors, such as age and vaccination status, or inherent differences  
121 among VOCs contribute to changes in viral copies. To do this, we first summarized and  
122 compared viral copies in various age groups (**Fig. 2A**). A positive correlation has been  
123 previously reported between age and SARS-CoV-2 viral copies, showing that younger age  
124 groups had lower viral copies independent of gender and/or symptom duration [22]. We  
125 observed a similar result in our dataset and found that the older age group (i.e., >70 years  
126 old) had the highest viral copies compared with other age groups (mean = 7.47, 95%  
127 confidence interval (CI): [5.12, 9.49],  $p < 0.001$ , Wilcoxon signed-rank test). For the effect of  
128 vaccination on viral copies, some studies have demonstrated that although vaccination  
129 reduced the risk of infections with the Delta variant, no significant difference in peak viral  
130 copies was found between fully vaccinated and unvaccinated individuals [6,7,23]. In contrast,  
131 other studies have shown that vaccination reduced viral copies in BA.1 infections among  
132 boosted individuals compared to unvaccinated ones [8]. These results suggest the effect of  
133 vaccination on viral copies may depend on the characteristics of the infecting SARS-CoV-2  
134 variant. We compared viral copies among groups with different vaccination statuses to  
135 assess the impact of vaccination on viral copies (**Fig. 2B**), and no statistically significant  
136 differences were detected between the groups in our data ( $p > 0.05$ , Wilcoxon signed-rank  
137 test). Finally, we compared viral copies stratified by variant category (**Fig. 2C**). Combining  
138 samples collected from all age and vaccination status groups for each variant, we found that  
139 the overall mean values of viral copies were lowest for infections with BA.1 (mean = 6.83,  
140 95% CI: [4.87, 8.87],  $p < 0.001$ , Wilcoxon signed-rank test) compared to infections with other  
141 variants.

142  
143 Since several factors may simultaneously impact the SARS-CoV-2 viral load, next, we sought  
144 to quantify the combined impact of age, vaccination status, and VOCs on the observed viral  
145 copies. To achieve this, we fitted a multivariate linear regression model, with viral copies as  
146 the outcome variable and age, vaccination, and VOCs as covariates (**Fig. 2D**). We found that  
147 the older age group (i.e., age >70 years old) had a positive association with viral copies (mean  
148 = 0.17, 95% CI: [0.09, 0.25],  $p < 0.001$ ) compared with the reference group (i.e., age <18  
149 years old). We also found that vaccination status was not associated with viral copies (i.e.,  
150 95% CIs of the vaccination coefficients span 0,  $p > 0.05$ ). Notably, we showed that infections  
151 with BA.1 were associated with reduced viral copies, with a mean effect size of -0.34 (95%  
152 CI: [-0.44, -0.24],  $p < 0.001$ ) in the same age group and vaccination status, compared to the  
153 Other variant. We also showed that infections with BA.2 (mean = 0.19, 95% CI: [0.09, 0.28],  
154  $p < 0.001$ ), BA.4, or BA.5 (mean = 0.17, 95% CI: [0.07, 0.26],  $p < 0.001$ ) were associated with  
155 increased viral copies. Among them, infections with BA.4 were associated with the largest  
156 positive effect size (mean = 0.27, 95% CI: [0.12, 0.41],  $p < 0.001$ ). Our findings demonstrated  
157 that variations in viral copies were associated with infections caused by different SARS-CoV-  
158 2 variants and the older age group. This implies that intrinsic factors of the viruses, such as  
159 genetic mutations among distinct VOCs, are key determinants impacting viral copies.

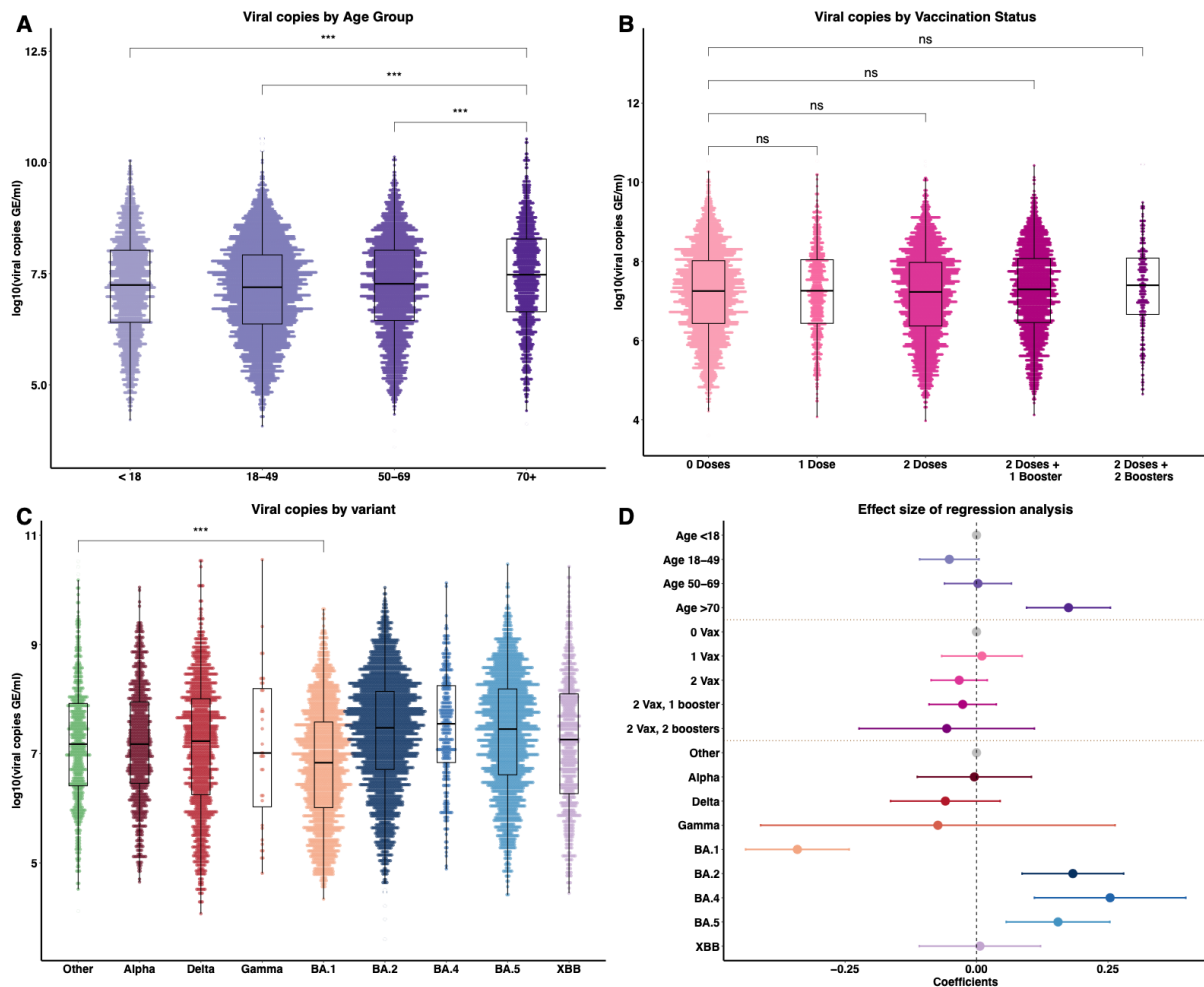

160  
 161 **Figure 2. Viral copies by category and regression analysis results.** Comparison of viral copies  
 162 stratified by (A) age groups, (B) vaccination statuses, (C) variant of concerns. (D) Association of age,  
 163 vaccination status, and VOCs with viral copies, expressed as  $\log_{10}$ (viral copies per milliliter (Genome  
 164 Equivalents/ml)). The reference groups (in gray) are Age <18 years old, 0 doses of vaccination, and the  
 165 Other variant, respectively. The positive coefficients indicate the covariate is associated with higher  
 166 viral copies value compared to the reference group, and vice versa. 0 Vax, 1 Vax, 2 Vax, 2 Vax 1  
 167 booster, and 2 vax 2 boosters denote vaccination statuses of 0 doses, 1 dose, 2 doses, 2 doses,  
 168 and 1 booster, and 2 doses and 2 boosters, respectively, corresponding to the labels in (B). Results are  
 169 shown as means with 95% confidence intervals. \*\*\*  $p < 0.001$ .

## 170 Viral GWAS reveals SARS-CoV-2 SNPs associated with viral copies

171 Having demonstrated that changes in SARS-CoV-2 viral copies are associated with infections  
 172 caused by different viral variants or strains, especially Omicron BA.1/BA.2/BA.4/BA.5 variants  
 173 (Fig. 2D), we then sought to identify potential genetic mutations—specifically, SNPs—that  
 174 contributed to these changes in viral copies. For this, we performed a GWAS analysis using  
 175 high-quality genome sequences (i.e., genome coverage > 95%). We conducted whole-  
 176 genome sequencing on the 9902 SARS-CoV-2 positive specimens collected from February  
 177 2021 to March 2023. Firstly, using Wuhan-Hu-1 (GenBank MN908937.3) as the reference  
 178 genome, we identified 10,697 SNPs for further testing associated with viral copies as  
 179 covariates. We then checked for the population structure of the 9902 genome sequences  
 180 using a multidimensional scaling (MDS) method [24] (Fig. S1). We observed that Delta was  
 181 an outgroup to other pre-Omicron variants (i.e., pre-VOC variant (Other), Alpha, and Gamma),  
 182 and BA.1 was an outgroup to the BA.2/BA.4/BA.5/XBB cluster. We included the inferred MDS

183 components from the pairwise SNP distance matrix of SARS-CoV-2 sequences in our model  
184 to capture the viral population structure. We also calculated the proportion of variance in our  
185 original sequence data accounted for by the MDS results. We found that 95% of the SARS-  
186 CoV-2 genetic variance could be explained by the two dimensions computed by MDS, which  
187 suggested that including these two dimensions in the regression analysis could adequately  
188 adjust for the population structure of the viral strains. The host factors, including age group  
189 and vaccination status, were also included in our model as covariates.

190  
191 Using the multivariate linear regression model on viral copies for each SNP, we identified 113  
192 SNPs exceeding the permuted threshold for genome-wide significance ( $p = 4.67 \times 10^{-6}$ ,  
193 dashed line, **Fig. 3A**). The threshold value was calculated as 0.05 divided by 10,697 SNPs  
194 [25]. We found that the observed distribution of  $p$ -values closely matches the expected  
195 distribution under the null hypothesis of no association (**Fig. S2A**). To ascertain whether those  
196 SNPs have a negative or positive impact on viral copies and evaluate their effect size, we  
197 extracted the coefficients ( $\beta$ ) of the SNPs with  $p < 1 \times 10^{-10}$  and their standard errors ( $\sigma$ )  
198 from the regression model (dashed box, **Fig. 3B**). We then annotated the SNPs to identify the  
199 associated amino acids, and among them, 44 SNPs were non-synonymous (i.e., changed the  
200 amino acid; **Fig. 3C**). We found that a non-synonymous change G252V, located on the S  
201 gene, had the most significant association with increased viral copies ( $p = 5.60 \times 10^{-22}$ ,  $\beta =$   
202  $1.21$ ,  $\sigma = 0.12$ ). By contrast, the amino acid change most strongly associated with a negative  
203 effect on viral copies was ORF1ab:V2857A ( $p = 5.66 \times 10^{-11}$ ,  $\beta = -1.32$ ,  $\sigma = 0.20$ ).

204  
205 To assess the impact of adjusting for the population structure of the SARS-CoV-2 strains  
206 using the MDS components on the regression results, we conducted a sensitivity analysis on  
207 the genome sequences using the defined sequence clusters (a categorical variable) as  
208 covariates. Clusters were defined using a  $k$ -means clustering method (**Fig. S1**). By doing this,  
209 we identified only 31 SNPs exceeding the permuted threshold (**Fig. S3**), compared to 113  
210 SNPs found in the analysis using MDS-computed dimensions as population control. The  
211 observed distribution of  $p$ -values also closely matched the expected distribution under the  
212 null hypothesis of no association (**Fig. S2B**). Of these, 25 out of the 31 identified amino acid  
213 changes were consistent with those previously observed, except for ORF1ab:P3395H,  
214 S:Q498R, N679K, Q954H, N969K, and N:R203M. The results may be more likely to reflect  
215 the SNPs that influence the viral copies independent of lineage.

216  
217 We also examined the association between viral copies and SNPs after adjusting for the  
218 population structure based on the VOCs themselves, which broadly correspond to the  
219 identified sequence clusters. To do this, we conducted sensitivity analyses on the genome  
220 sequences within each sequence cluster defined by a  $k$ -means clustering method (**Fig. S1**).  
221 We showed that only a few SNPs were found (**Figs. S4-7**), mostly within the Omicron  
222 BA.2/BA.4/BA.5/XBB cluster (**Fig. S7**).

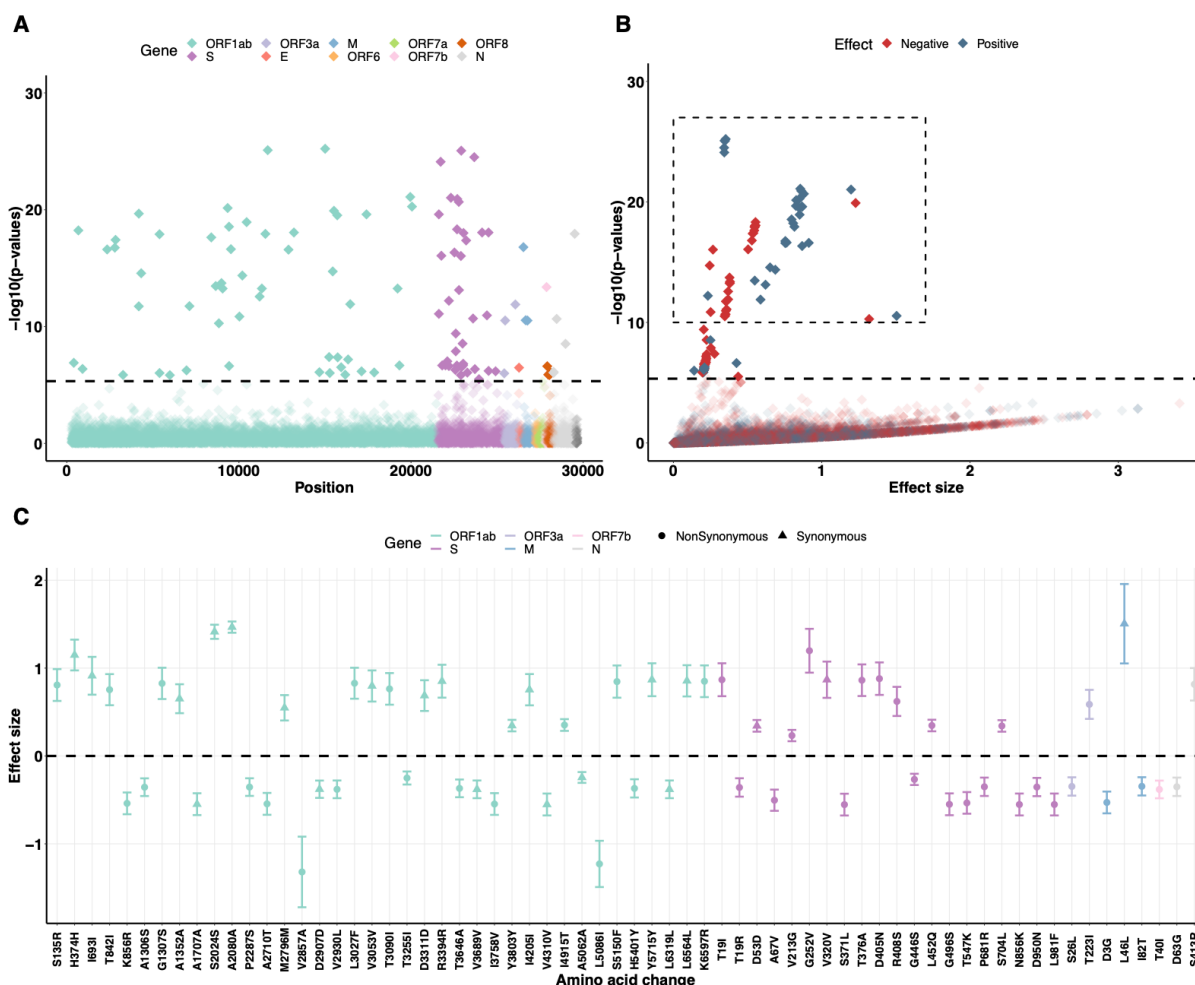

223  
 224 **Figure 3. GWAS analysis identifies several single nucleotide polymorphisms (SNPs) that are**  
 225 **associated with the changes in viral copies. (A)** Genome-wide association results of the impact of  
 226 identified SNPs on viral copies during SARS-CoV-2 infection. The dashed line indicates the permuted  
 227 threshold for genome-wide significance  $p = 4.67 \times 10^{-6}$ . Significant SNPs are shown with solid colors.  
 228 **(B)** SNPs (with  $p < 1 \times 10^{-10}$ ) that have positive (blue) or negative (red) effects on viral copies. **(C)** The  
 229 corresponding synonymous (triangles) and non-synonymous (circles) amino acid changes that  
 230 associate with increased or decreased viral copies. Data is shown as means with 95% confidence  
 231 intervals. The estimated effective sizes and associated standard deviations are given in **Table S1**. A  
 232 Q-Q plot showing the observed distribution of  $p$ -value and the expected distribution is given in **Fig.**  
 233 **S2**.  
 234

235 The impact of amino acid changes in the S gene on viral copies is  
 236 dependent on the variant

237 Having identified the 44 non-synonymous SNPs with statistically significant effects on viral  
 238 copies in our primary analysis, we next sought to understand the temporal patterns of the  
 239 emergence of these amino acid changes (**Fig. 4**). To investigate the clustering of these SNPs,  
 240 we randomly sampled approximately 120 genome sequences from each VOC category (only  
 241 36 sequences were available for Gamma in our dataset) and generated a phylogenetic tree  
 242 drawing upon the subsamples (**Fig. 4A**). We first focused on the 18 amino acid changes in  
 243 the S gene and found a clear pattern in how these mutations emerged by VOC (**Fig. 4A**  
 244 heatmap). Notably, we found that all amino acid changes associated with a positive effect on  
 245 viral copies were found in BA.2/BA.4/BA.5/XBB infections. Often, more than one amino acid

246 change was observed in each sampled sequence, suggesting genetic linkage between these  
247 SNPs. In particular, we identified that the amino acid changes L452Q ( $p = 3.91 \times 10^{-25}$ ,  $\beta =$   
248  $0.34$ ,  $\sigma = 0.03$ ) and S704L ( $p = 1.35 \times 10^{-24}$ ,  $\beta = 0.34$ ,  $\sigma = 0.03$ ) associated with a positive  
249 effect on viral copies were typically observed in combination with BA.2 infections—  
250 specifically, lineage BA.2.12.1. By contrast, a retrospective cohort study has shown that the  
251 risk of death due to COVID-19 was lower for Omicron BA.1 compared with Delta (B.1.617.2)  
252 infections [26]. Here, we observed that the amino acid changes with negative effects on viral  
253 copies were mostly associated with BA.1 and Delta infections. Among these SNPs, we  
254 observed that A67V, S371P, G496S, T547K, N856K, and L981F, exclusively associated with  
255 BA.1 infections, had a comparatively larger (negative) impact on viral copies (mean = -0.54,  
256 95% CI: [-0.55, -0.51]) than the others (T19R, G446S, P681R and D950N) with a mean of -  
257 0.33 and a 95% CI: [-0.36, -0.27], which were also present in Delta or XBB infections.

258  
259 To explore the temporal dynamics of these S gene amino acid changes, we calculated the  
260 fraction of mutations occurring in the sequences for each day, thereby accounting for the  
261 number of introductions to the population (**Fig. 4B**). We observed SNPs (T19I, V213G, T376A,  
262 D405N, and R408S) with a positive impact on viral copies emerging in sequences sampled  
263 from February 2022, when BA.2 was first detected in Connecticut. These SNPs were  
264 consistently observed in almost every sequence thereafter. By contrast, we found that the  
265 other two amino acid changes (L452Q and S704L) that had a positive effect on viral copies  
266 were only in the samples from BA.2 infections and did not arise again in lineages of BA.4 or  
267 BA.5. The G252V amino acid change was associated with higher viral copies; however, we  
268 found that the SNP only appeared in a few sequences associated with XBB infections. For  
269 those SNPs that had a negative association with viral copies, we observed that most of them  
270 (A67V, S371P, G496S, T547K, N856K, and L981F) were present in samples associated with  
271 BA.1 infections and did not persist when BA.1 was replaced by BA.2. We also noted that  
272 other mutations, e.g., T19R, P681R and D950N, were only found in samples from Delta  
273 infections, and that G446S ( $p = 5.56 \times 10^{-16}$ ,  $\beta = -0.26$ ,  $\sigma = 0.03$ ) was first found in samples  
274 from BA.1 infections but absent in BA.2/BA.4/BA.5 infections and reemerged in XBB  
275 infections.

276



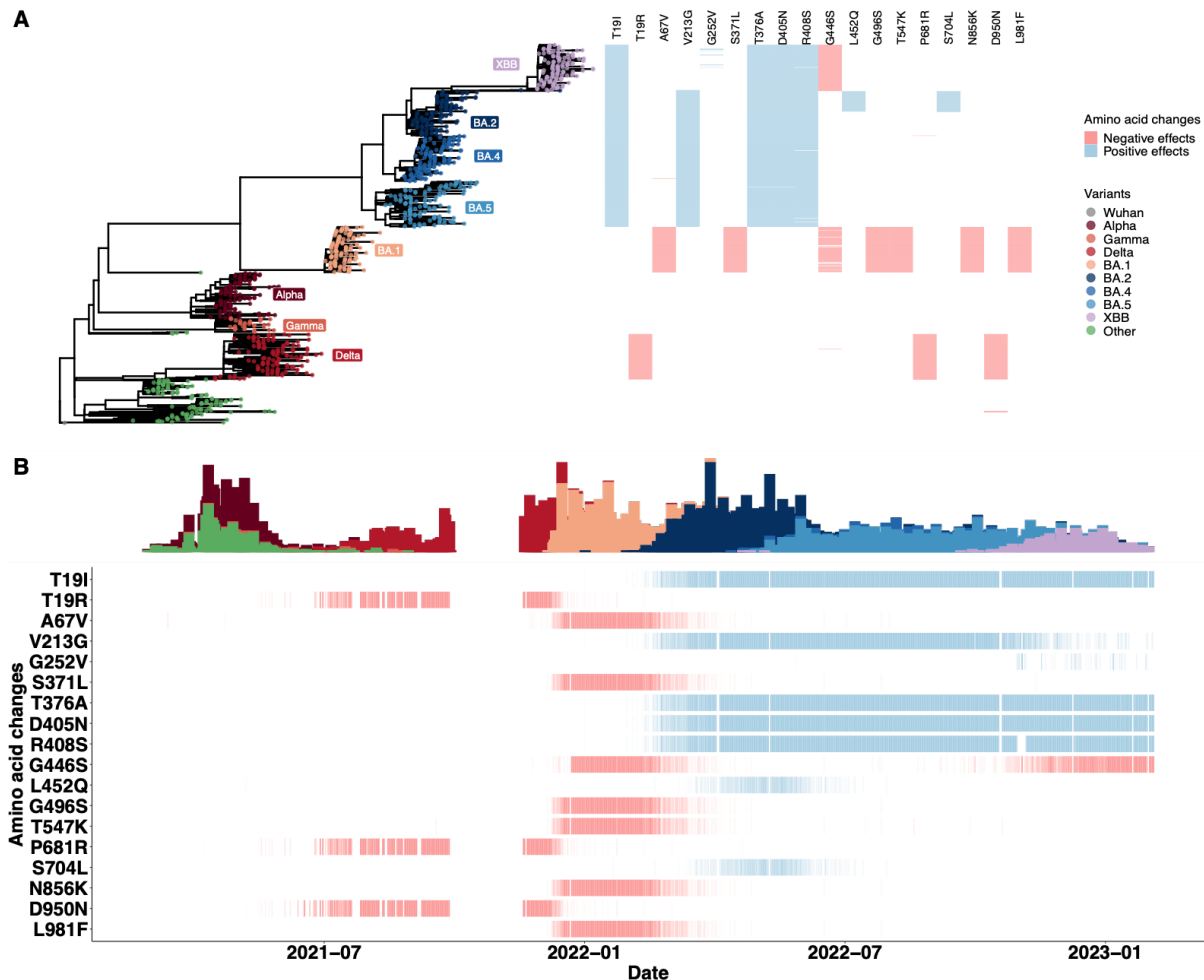

277  
 278 **Figure 4. The temporal dynamics of amino acid changes in the S gene associated with changes**  
 279 **in viral copies.** The results are based on the multivariate regression analysis using the two MDS  
 280 components as covariates. **(A)** The phylogenetic tree estimated from a representative set of 996  
 281 genome sequences showing variant assignments and the locations of amino acid changes that  
 282 increase (blue) or decrease (red) viral copies. **(B)** The temporal dynamics of the SNPs from February  
 283 2021 to March 2023. The transparency of the color corresponds to the mutation fraction in the daily  
 284 sequence count: transparent color indicates low fractions, and opaque color indicates high fractions.  
 285

286 Amino acid changes in the ORF1ab gene show similar temporal patterns  
 287 to those in the S gene

288 Having observed the SNP pattern in the S gene, our next aim was to determine if the same  
 289 temporal patterns persisted for the amino acid changes in the ORF1ab gene (**Fig. 5**). We  
 290 found that the presence of SNPs associated with an increase in viral copies were observed  
 291 in BA.2/BA.4/BA.5/XBB infections, while those associated with a decrease in viral copies  
 292 were observed in Delta or BA.1 infections (**Fig. 5A**). This pattern was consistent with our  
 293 observations for the S gene. Additionally, we identified similar temporal dynamics of  
 294 mutations in the ORF1ab gene, mirroring the pattern seen in the S gene (**Fig. 5B**). These  
 295 trends were consistently observed in the temporal dynamics of amino acid changes in the M,  
 296 ORF3a, and ORF7b genes as well (**Fig. S8**). In particular, we found that ORF1ab:I4915T ( $p =$   
 297  $2.36 \times 10^{-25}$ ,  $\beta = 0.35$ ,  $\sigma = 0.04$ ) was only associated with BA. 2 infections. We also found  
 298 that, although ORF1ab:V2857A had the most significant effect in reducing viral copies ( $p =$   
 299  $5.66 \times 10^{-11}$ ,  $\beta = -1.32$ ,  $\sigma = 0.20$ ), it only appeared in 24 samples (0.24% of the sample size)

300 with BA.1 infections. Furthermore, we identified that ORF1ab:T3255I ( $p = 1.02 \times 10^{-11}$ ,  $\beta = -$   
 301 0.25,  $\sigma = 0.04$ ) was consistently detected in Delta and other Omicron variants and was  
 302 associated with decreased viral copies.  
 303  
 304

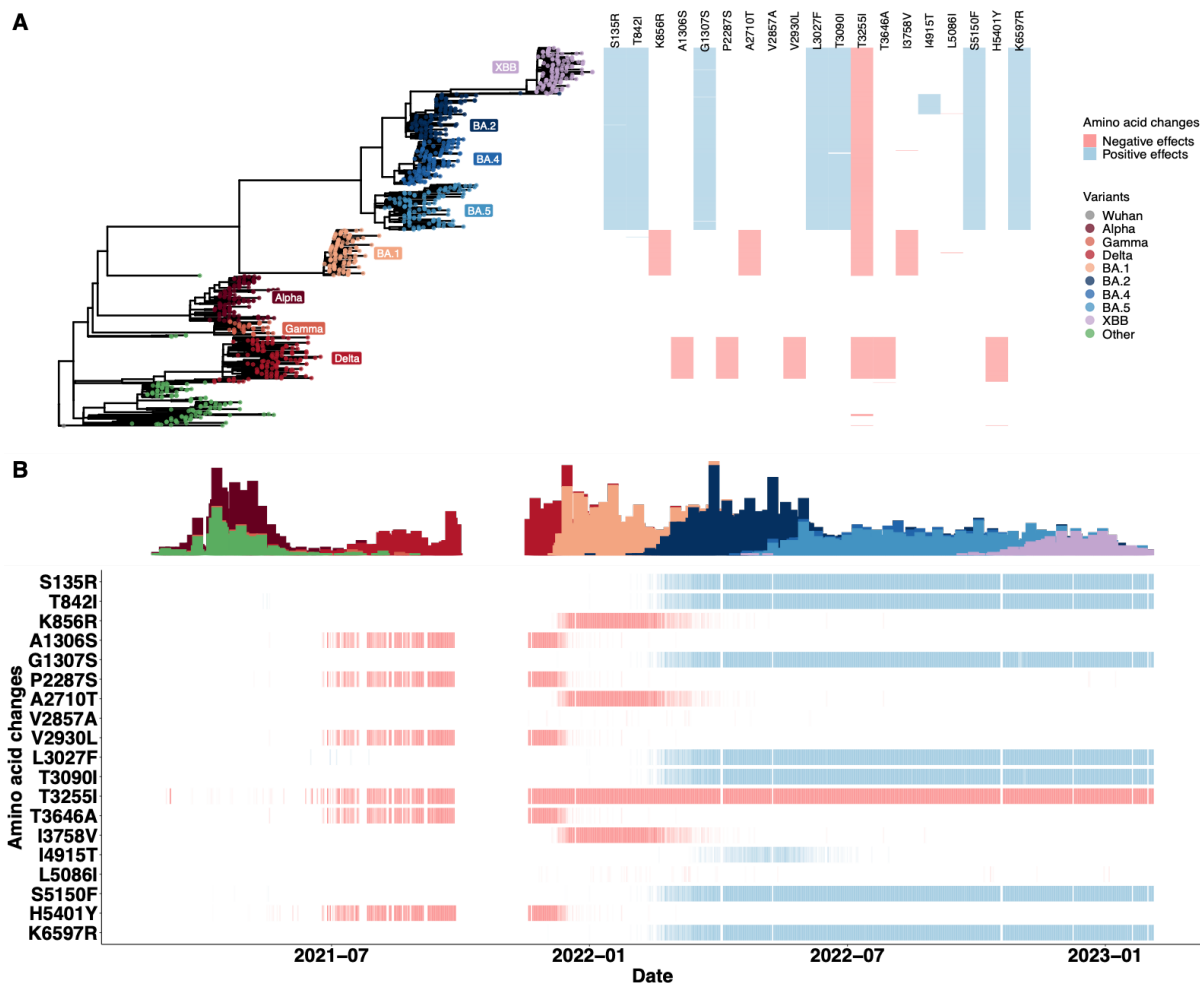

305  
 306 **Figure 5. The temporal dynamics of amino acid changes in the ORF1ab gene associated with**  
 307 **changes in viral copies.** The results are based on the multivariate regression analysis using the two  
 308 MDS components as covariates. **(A)** The phylogenetic tree estimated from a representative set of 996  
 309 genome sequences showing variant assignments and the locations of amino acid changes that  
 310 increase (blue) or decrease (red) viral copies. **(B)** The temporal dynamics of the SNPs from February  
 311 2021 to March 2023. The transparency of the color corresponds to the mutation fraction in the daily  
 312 sequence count: transparent color indicates low fractions, and opaque color indicates high fractions.

313 GWAS analysis identified a subset of variant-defining amino acid  
 314 substitutions

315 Experimental investigations on the specific amino acid substitutions that define emerging  
 316 VOCs for SARS-CoV-2 have yielded insights into viral transmissibility and immune escape  
 317 [27–33]. Here, we compared the identified SNPs using our GWAS method with all variant-  
 318 defining amino acid changes (**Fig. 6**). The variant-defining amino acid changes were defined  
 319 as those mutations with >75% prevalence in at least one lineage, as estimated on the  
 320 [outbreak.info](https://www.outbreak.info) website [33]. Our GWAS analysis identified a subset of the variant-defining  
 321 amino acid substitutions in the S (**Fig. 6A**) and ORF1ab genes (**Fig. 6B**) that were associated  
 322 with the changes in viral copies. More importantly, we were able to identify S L452Q and

323 S704L, which primarily emerged within the sublineage BA.2.12.1. These were not identified  
 324 as variant-defining mutations on the [outbreak.info](https://www.outbreak.info) website. The results imply the applicability  
 325 of GWAS of SARS-CoV-2 genome sequences to identify the associations between viral  
 326 copies and amino acid changes without exclusively focusing on variant-defining SNPs.  
 327

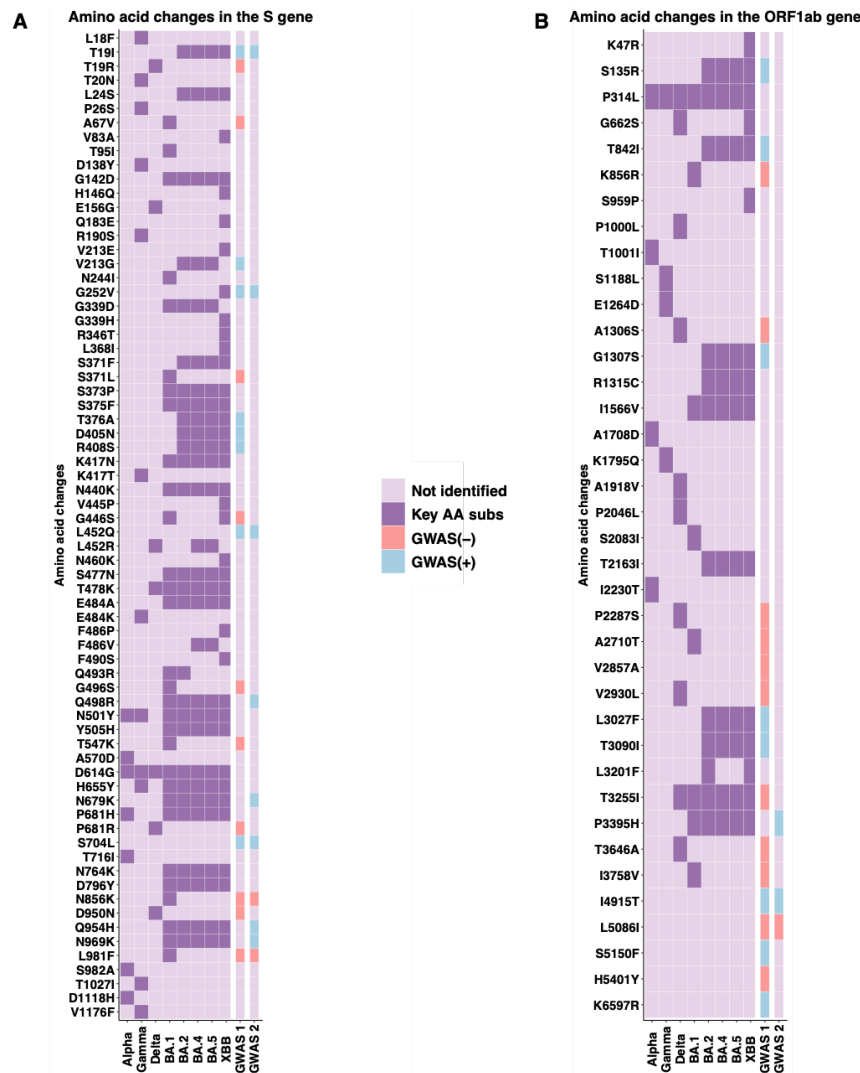

328  
 329 **Figure 6. Comparison of key variant-defining amino acid changes with GWAS-identified**  
 330 **substitutions.** The comparison of the key amino acid changes (dark purple) in each variant, with  
 331 GWAS-identified SNPs that were associated with negative (red) or positive (blue) effects on viral copies  
 332 in the (A) S gene and (B) ORF1ab gene. The results of GWAS analysis using the two dimensions  
 333 computed by MDS as covariates are shown as “GWAS 1”, and the results of GWAS analysis using the  
 334 categorical clusters as covariates are shown as “GWAS 2”. The effective sizes of identified SNPs using  
 335 different population control methods are given in **Tables S1** and **S2**, respectively.

## 336 Discussion

337 We conducted a GWAS analysis on 9,902 high-quality SARS-CoV-2 genome sequences  
 338 generated from two years of genomic surveillance in Connecticut, US to identify and evaluate  
 339 SNPs that were associated with variations in viral copies during infections. Both viral factors  
 340 and host characteristics can have impacts on viral replication at the within-host level [3,6–9].  
 341 Using a GWAS approach, we were able to identify and examine virus-related factors that

342 were associated with the observed variations in viral copies. This was achieved by combining  
343 data from a large cohort of individuals infected with different VOCs and employing a  
344 regression model that accounted for both individual (i.e., age and vaccination status) and  
345 virus-level factors (i.e., specific SNPs and genetic background) in viral copies. We identified  
346 several SNPs corresponding to non-synonymous amino acid changes in the SARS-CoV-2  
347 genome that were individually associated with the variations in viral copies. In particular,  
348 temporal patterns of the SNPs revealed that SNPs associated with increased viral copies  
349 were predominantly observed in Omicron BA.2/BA.4/BA.5/XBB infections, whereas those  
350 associated with decreased viral copies were mostly observed in infections with Delta and  
351 Omicron BA.1 variants.

352  
353 Using GWAS analysis, we identified a subset of variant-defining amino acid changes in Delta  
354 and Omicron variants. Note that we did not detect any substitutions in the Alpha and Gamma  
355 variants (likely due to the low sample size for Gamma). We also identified SNPs that did not  
356 define any major variant category, including S:L452Q and S704L that were specifically  
357 associated with BA.2.12.1, a sublineage of BA.2 that briefly dominated during the pandemic  
358 (i.e., dominated mainly in the US between March and May 2022). This highlights the  
359 application of GWAS for identifying SNPs associated with important phenotypic effects  
360 without requiring a set of lineage-defining mutations to be defined a priori. Nevertheless,  
361 there are several reasons why we only detected a subset of the SNPs that defined different  
362 VOCs. Firstly, SNPs with small effect sizes may not be detected due to the stringent statistical  
363 significance thresholds applied in GWAS. Secondly, lineage-defining SNPs that are in low  
364 linkage disequilibrium with the causal mutations may not be detected [34], even if they may  
365 be functionally relevant. Our results showcase how GWAS can help to narrow the focus of  
366 SNPs associated with specific phenotypes, generating hypotheses for further investigation.

367  
368 A key result from our analysis is that SNPs associated with viral copies did not exhibit the  
369 same temporal dynamics, even though they could have similar (either positive or negative)  
370 effects on viral copies. Some amino acid changes, for example, ORF1ab:I4915T (positive  
371 effects), were only present in samples with BA.2 infections and disappeared when new  
372 Omicron variants emerged. Other SNPs (e.g., S:T19R and ORF1ab:S135R), while also  
373 associated with higher viral copies, were observed and persisted in all BA.2/BA.4/BA.5/XBB  
374 infections. The distinct temporal pattern of SNPs, dependent on VOCs, may help explain the  
375 different fitness levels (e.g., intrinsic transmissibility or immune escape) of each variant  
376 [35,36]. For example, S:L452Q has been suggested to increase viral infectivity and affinity to  
377 angiotensin-converting enzyme 2, thereby enhancing the ability to circumvent vaccine-  
378 induced immune responses [37]. Different VOCs have been suggested to exhibit variations in  
379 cell tropisms, with BA.1 showing a preference for the upper respiratory tract [1,38]. This  
380 preference could be associated with specific mutations which may have causal effects on  
381 intracellular viral replication dynamics in different host cell types. Recent studies indicated  
382 that BA.2 infections were characterized by a higher peak viral load, as shown in [39–41]. This  
383 is consistent with our analysis, where we found that SNPs associated with an increase in viral  
384 copies were linked to BA.2 infections. The shift from negative to positive effect SNPs on viral  
385 copies from BA.1 to BA.2 may explain the observed rapid replacement of BA.1 by BA.2 and  
386 the subsequent fast spread of BA.2 infections [42].

387  
388 In addition, we showed that S:G446S was associated with decreased viral copies in primarily  
389 BA.1 and XBB infections. Motozono et al. [43] have previously demonstrated that the  
390 mutation could affect antigen presentation and potentiate antiviral activity by vaccine-  
391 induced T cells, leading to enhanced T cell recognition. We also identified a previously

392 studied amino acid change, T3255I, in the ORF1ab gene. This SNP is located at site 492 in  
393 non-structural protein 4 (NSP4) and carried by both the Delta and Omicron variants. The  
394 mutation has been implied to increase the replication capacity of the virus and improve its  
395 ability to evade host immune responses [44]. Using phylogenomic analysis, we identified that  
396 the mutation was present in both the Delta and Omicron variants, with a negative impact on  
397 viral copies. These two mutations, S:G446S and ORF1ab:T3255I were found in different  
398 genetic backgrounds, which may provide evidence that they may influence the viral load  
399 independent of the background/lineage.

400  
401 Several studies indicate that the Delta variant is linked to higher viral loads and increased  
402 transmissibility compared to the Alpha variant [45–47]. In contrast, another study found no  
403 significant difference in the mean peak viral load (indicated by a cycle threshold value)  
404 between Delta infections and the pre-VOC variant [7,48]. Here, we identified mostly SNPs  
405 associated with decreased viral copies in Delta infections, except for one N:R203M (**Fig. S9**).  
406 The discrepancy of these results suggests that the relationship between Delta variant  
407 infections, viral copies, and associated factors is multifaceted, requiring careful consideration  
408 of several factors and large datasets to investigate such patterns. Differences in population  
409 demographics, the dynamic nature of viral evolution, or study methodologies (e.g., diagnostic  
410 assays) could all influence the observed viral copies. Previous studies inferring viral load  
411 differences in infections by VOCs normally analyzed viral copy data from large cohorts of  
412 individuals without explicitly accounting for the influence of host factors, such as age, host  
413 immunity, symptomatic conditions, and infection history. These factors could potentially  
414 contribute to variations in viral load. Not only does host immunity and variants shape within-  
415 host viral dynamics of SARS-CoV-2 infections, but individual heterogeneity also plays a more  
416 important role in determining the viral kinetics [49]. For instance, an increased viral load was  
417 observed primarily in the younger population with Delta infections [46]. The association of  
418 higher viral loads with a younger age group raises intriguing questions about age-related  
419 susceptibility and immune responses, both for specific variants and for SARS-CoV-2 in  
420 general, as discussed in [50]. Alternatively, inconsistent results in various studies may arise  
421 from using data on different sub-lineages of SARS-CoV-2, for example those belonging to  
422 the Delta variant (e.g., B.1.617.2 and AY). Another possibility for not detecting any positive-  
423 effect SNPs in Delta infections is that the increased viral copies in Delta infections may result  
424 from the concurrent accumulation of multiple mutations, which may introduce non-additive  
425 epistatic effects that can be difficult to unpick [28]. In this study, however, we employed a  
426 series of single SNP regression models to identify the underlying SNPs associated with the  
427 changes in viral copies. This was achieved by performing individual regression analyses for  
428 each of the 10,697 SNPs one at a time, without accounting for potential interactions between  
429 SNPs. A multiple SNP regression study, which allows for testing potential interactions or joint  
430 effects among multiple SNPs, albeit challenging due to multicollinearity, will be left for future  
431 study.

432  
433 There are limitations to our study. First, the common cooccurrences of identified SNPs make  
434 it impossible to evaluate their individual effects on viral copies, which is an overall limitation  
435 of GWAS. However, our findings provide valuable insights into the overall genetic landscape  
436 of the viral population and identify potential genetic variants that could be further explored.  
437 Second, we assumed that the distribution of times between infection and sample collection  
438 was similar through time and across variants as these data were not available. Given our  
439 samples were taken frequently over a 2-year period, we do not anticipate that this assumption  
440 will qualitatively impact our results. Third, our study primarily focuses on the genetic variants  
441 in VOCs, neglecting other factors such as host immune responses or environmental

442 influences, partially captured by the host-associated covariates, including age and  
443 vaccination status in this study, that may also contribute to the changes in viral copies.  
444 Further study will be needed to address the impact of these factors on viral copies, for  
445 example, genome-to-genome analysis to reveal the impact of host-viral genetic interactions  
446 in SARS-CoV-2 infections [20,51]. Fourth, our data were obtained from a specific geographic  
447 region, whose population diversity may not necessarily be similar to other settings; therefore,  
448 extrapolating these findings to a broader population may require caution. Additionally,  
449 focusing solely on consensus genomic changes in the analysis could overlook the genetic  
450 diversity within the sample, which may also influence variations in viral load. Despite these  
451 constraints, our study highlights the importance of sustained genomic surveillance and the  
452 need for comprehensive analyses to understand the nuanced impact of specific genetic  
453 variations on viral copies at the within-host level, and its implications for viral transmissibility  
454 and immune escape at the population level. Further work and collaborative efforts are  
455 essential to elucidate the complex interplay between viral genetics, host factors, and the  
456 dynamics of transmission associated with emerging variants. Such studies could inform  
457 predictive early warning public health systems regarding the emergence of potentially highly  
458 transmissible viral strains based on their constellation of mutations.

459  
460 Recently, Duesterwald et al. [12] used genome sequence data and a machine-learning  
461 approach to predict cycle threshold (Ct) values of SARS-CoV-2 infections based on the *k*-  
462 mers. Similar to our findings, they suggested that S:L452 and P681 were hallmarks of VOCs,  
463 implying impacts on the observed Ct values in clinical samples. Although the machine-  
464 learning approach may capture broader patterns and interactions within the genome on Ct  
465 values, they lack interpretability compared to regression models. For example, regression-  
466 based models could offer insights into the direct association between specific genetic  
467 variants and viral copies. In addition, regression-based models may perform well even with  
468 limited sample sizes [19], provided that the assumptions of the model are met and the  
469 predictors are informative, whereas using machine-learning methods with small sample sizes  
470 can be challenging.

471  
472 With the availability of high-quality whole-genome sequences for SARS-CoV-2, we  
473 demonstrated that GWAS analysis of the viral genome can identify SNPs that associate with  
474 positive or negative impacts on viral copies in VOCs, revealing important biological insights  
475 and enhancing our understanding of within-host viral dynamics. We argue that the application  
476 of GWAS analyses to study viral genomes provides a particularly tractable tool to identify  
477 potential SNPs of interest for further evaluation using genetic engineering for several reasons.  
478 First, the small genome size of viruses and high evolutionary rates make it easier to perform  
479 comprehensive genome-wide scans for SNPs and to experimentally test the impacts of SNPs  
480 on specific traits. Second, significant phenotypic variations (e.g., viral loads and antibody  
481 responses) are often observed in viral infections, despite limited changes in the viral genome.  
482 GWAS can help to identify SNPs that correlate with these phenotypic variations, providing  
483 insights into the genetic basis of these traits. Third, the increasing accessibility to sequence  
484 viral genomes makes it possible to perform GWAS on rich datasets, enabling in-depth  
485 analysis of the temporal dynamics of viral evolution. Together, the applicability of GWAS  
486 analyses to study viral genomes can provide a new approach for exploring the intricate  
487 interplay between genetic mutations and phenotypes, informing strategies for managing and  
488 mitigating the impact of emerging viral variants, and contributing to the development of  
489 potential therapeutic interventions.

490

## 491 Materials & Methods

### 492 Ethics

493 The Institutional Review Board from the Yale University Human Research Protection Program  
494 determined that the RT-qPCR testing and sequencing of de-identified remnant COVID-19  
495 clinical samples obtained from clinical partners conducted in this study is not research  
496 involving human subjects (IRB Protocol ID: 2000028599).

### 497 Clinical sample collection and measurement of viral copies by RT-qPCR

498 SARS-CoV-2 positive samples (nasal swabs in viral transport media) were collected through  
499 the Yale New Haven Hospital (YNHH) System as a part of routine inpatient and outpatient  
500 testing and sent to the Yale SARS-CoV-2 Genomic Surveillance Initiative. Using the MagMAX  
501 viral/pathogen nucleic acid isolation kit, nucleic acid was extracted from 300µl of each clinical  
502 sample and eluted into 75µl of elution buffer. Extracted nucleic acid was then used as  
503 template for a “research use only” (RUO) RT-qPCR assay [21] to test for presence of SARS-  
504 CoV-2 RNA. Ct values from the nucleocapsid target (CDC-N1 primer-probe set [52]) were  
505 used to derive viral copy numbers using a previously determined standard curve for this  
506 primer set [53]. A positive RNA control with defined viral copy number (1000/µl) was used to  
507 standardize results across individual runs.

### 508 Whole genome sequencing

509 Libraries were prepared for sequencing using the Illumina COVIDSeq Test (RUO version) and  
510 quantified using the Qubit High Sensitivity dsDNA kit. Negative controls were included for  
511 RNA extraction, cDNA synthesis, and amplicon generation. Prepared libraries were  
512 sequenced at the Yale Center for Genomic Analysis on the Illumina NovaSeq with a 2x150  
513 approach and at least 1 million reads per sample.

514

515 Reads were then aligned to the Wuhan-Hu-1 reference genome (GenBank MN908937.3)  
516 using BWA-MEM v.0.7.15 [54]. Adaptor sequences were then trimmed, primer sequences  
517 masked, and consensus genomes called (simple majority >60% frequency) using iVar  
518 v1.3.133 [55] and SAMtools v1.11 [56]. When <20 reads were present at a site an ambiguous  
519 “N” was used, with negative controls consisting of ≥99% Ns. The Pangolin lineage assignment  
520 tool [57] was used for assigning viral lineages.

### 521 Clinical metadata

522 We obtained patient metadata and vaccination records from the YNHH system and the  
523 Center for Outcomes Research and Evaluation (CORE) and matched these records to  
524 sequencing data through unique sample identifiers. Duplicate patient records or those with  
525 missing or inconsistent metadata and vaccination date were removed from the GWAS  
526 analysis. We also removed patient records with persistent infections.

527 We determined vaccination status at time of infection by comparing the sample collection  
528 date to the patient’s vaccination record dates. We categorized vaccine statuses based on  
529 the number of vaccine doses received at least 14 days before the collection date. Patient

530 vaccination statuses at the time of infection were categorized as follows: non-vaccine, one-  
531 dose vaccine, two-dose vaccine, two-dose vaccine with one booster, or two-dose vaccine  
532 with two boosters. We calculated the age of each patient as the difference between the  
533 date of birth and the sampling date.

### 534 Single nucleotide polymorphisms

535 To identify single nucleotide polymorphisms (SNPs), we first aligned the 9902 genome  
536 sequences using *nextalign* (v3.2.1) [58] with the reference genome of the Wuhan-Hu-1  
537 genome (GenBank accession: MN908937.3). Then, SNPs were identified using *snp-sites*  
538 (v2.4.1) [59], with the reference genome of the Wuhan-Hu-1 genome (GenBank accession:  
539 MN908937.3). We also normalized the SNPs in the generated VCF file, such that multiallelic  
540 SNPs were separated into different rows. Normalizing the SNPs ensured that each SNP was  
541 one-hot encoded and analyzed separately. Note that we did not include ambiguous SNPs,  
542 deletions and insertions in our GWAS analysis. We used *vcf-annotator* (v0.7) to annotate  
543 SNPs to corresponding amino acid changes.

### 544 Multidimensional scaling and population control

545 To reveal the underlying structure of the 9902 genome sequences. We first used *snp-dists*  
546 (v0.7.0) [60] to convert the aligned sequences (a FASTA alignment) to a SNP distance matrix.  
547 We then applied a multidimensional scaling (MDS) method [24] to transform the SNP distance  
548 matrix into a geometric configuration while preserving the original pairwise relationships. The  
549 scaling was conducted using *cmdscale* function in an R package *stats* (v3.6.2). We set the  
550 maximal dimensional parameter  $k = 2$ .

551  
552 To measure the goodness of the transformation, we calculated the distance between the  
553 original genome sequencing data and compared it with the new distances determined by  
554 MDS. This involved arranging the two matrices of distances into two columns and computing  
555 the correlation coefficient (i.e.,  $r$ ) between them. Finally, we used  $r^2$  to measure the  
556 proportion of variance in the original distance matrix explained by the new computed distance  
557 matrix.

### 558 Testing for associations between viral copies and SNPs

559 In this work, we conducted a series of single SNP regression analyses to test for associations  
560 between viral copies and SNPs. The linear regression model is written as follows:

$$561 \quad Y \sim \alpha W + \beta_i SNP_i + \xi_1 d_1 + \xi_2 d_2 + e,$$

562 where  $Y$  is a vector of normalized  $\log_{10}$ -transformed viral copies,  $W$  is a matrix of covariates,  
563 including age (a categorical variable with four age groups of “<18”, “18-49”, “50-69”, and  
564 “>70” years old), vaccination status (a categorical variable with vaccination statuses of “0  
565 doses”, “1 dose”, “2 doses”, “2 doses and 1 booster”, “2 doses and 2 boosters”) and an  
566 intercept, and  $\alpha$  is a vector that corresponds to coefficients of the covariates. In particular,  
567  $SNP_i$  is a vector of genotype values for all samples at each SNP,  $i$ . It is a binary variable: 0  
568 represents the SNP is not present in the genome sequence, whereas 1 represents its  
569 presence.  $\beta_i$  is the effective size of each identified SNP,  $i$ . The vectors  $d_1, d_2$  represent the  
570 two dimensions computed by MDS, and  $\xi_1, \xi_2$  are the coefficients of the dimension  
571 covariates. The random effect of residual errors is presented by  $e$ , which is assumed to follow  
572 a normal distribution with a mean of 0 and a standard deviation of  $\sigma_e$ .



## 573 Phylogenetic tree construction and comparison to variant-defining 574 substitutions

575 We employed *iq-tree* (v2.2.2.6) [61] of a representative set using 996 of our 9902 genome  
576 sequences for tree construction, using Wuhan-Hu-1 (GenBank MN908937.3) as the reference  
577 genome. The variant-defining amino acid changes were defined as those mutations  
578 with >75% prevalence in at least one lineage, as estimated on [outbreak.info](https://outbreak.info) website [33].  
579 Note that we did not include deletions in variant-defining substitutions.

## 580 Data and code availability

581 We used the R statistical software (v4.0.2) for all statistical analyses and visualization. Data  
582 and code used in this study are publicly available on Github:  
583 [https://github.com/grubaughlab/2024\\_paper\\_GWAS](https://github.com/grubaughlab/2024_paper_GWAS). All genome sequences used for the  
584 GWAS analysis and a subset of the associated metadata (accession number, virus name,  
585 collection date, originating lab and submitting lab, and the list of authors) in this dataset are  
586 published in GISAID's EpiCoV database: <https://doi.org/10.55876/gis8.240219fh>. The de-  
587 identified and coded clinical metadata associated with the sequenced samples are available  
588 upon request with IRB approval.

## 589 Acknowledgements

590 We would like to thank Verity Hill, Seth Redmond, Jiye Kwon, Rafael Lopes, Sophie Taylor,  
591 and Philip Jack for their helpful conversations and feedback on this work. This project is  
592 supported by the Centers for Disease Control and Prevention (CDC) Broad Agency  
593 Announcement Contract 75D30122C14697 (NDG). This work does not necessarily represent  
594 the views of the CDC.  
595

## 596 Competing Interest Statement

597 NDG is a paid consultant for BioNTech, DMW has received consulting fees from Pfizer,  
598 Merck, and GSK, unrelated to this manuscript, and has been PI on research grants from  
599 Pfizer and Merck to Yale, unrelated to this manuscript.

## 600 Yale SARS-CoV-2 Genomic Surveillance Initiative Authors

601 Tara Alpert, Kaya Bilguvar, Kendall Billig, Mallery Breban, Anderson Brito, Christopher  
602 Castaldi, Rebecca Earnest, Bony De Kumar, Joseph Fauver, Chaney Kalinich, Tobias Koch,  
603 Marie Landry, Shrikant Mane, Isabel Ott, David Peaper, Mary Petrone, Kien Pham, Jessica  
604 Rothman, Irina Tikhonova, Chantal Vogels, Anne Watkins  
605  
606  
607  
608  
609  
610  
611

## 612 References

- 613 1. Killingley B, Mann AJ, Kalinova M, Boyers A, Goonawardane N, Zhou J, et al. Safety, tolerability  
614 and viral kinetics during SARS-CoV-2 human challenge in young adults. *Nat Med.* 2022;28:  
615 1031–1041. doi:10.1038/s41591-022-01780-9
- 616 2. Marks M, Millat-Martinez P, Ouchi D, Roberts CH, Alemany A, Corbacho-Monné M, et al.  
617 Transmission of COVID-19 in 282 clusters in Catalonia, Spain: a cohort study. *Lancet Infect Dis.*  
618 2021;21: 629–636. doi:10.1016/S1473-3099(20)30985-3
- 619 3. Jones TC, Biele G, Mühlemann B, Veith T, Schneider J, Beheim-Schwarzbach J, et al.  
620 Estimating infectiousness throughout SARS-CoV-2 infection course. *Science.* 2021;373.  
621 doi:10.1126/science.abi5273
- 622 4. Cevik M, Tate M, Lloyd O, Maraolo AE, Schafers J, Ho A. SARS-CoV-2, SARS-CoV, and MERS-  
623 CoV viral load dynamics, duration of viral shedding, and infectiousness: a systematic review and  
624 meta-analysis. *Lancet Microbe.* 2021;2: e13–e22. doi:10.1016/S2666-5247(20)30172-5
- 625 5. Singanayagam A, Patel M, Charlett A, Lopez Bernal J, Saliba V, Ellis J, et al. Duration of  
626 infectiousness and correlation with RT-PCR cycle threshold values in cases of COVID-19,  
627 England, January to May 2020. *Euro Surveill.* 2020;25. doi:10.2807/1560-  
628 7917.ES.2020.25.32.2001483
- 629 6. Singanayagam A, Hakki S, Dunning J, Madon KJ, Crone MA, Koycheva A, et al. Community  
630 transmission and viral load kinetics of the SARS-CoV-2 delta (B.1.617.2) variant in vaccinated  
631 and unvaccinated individuals in the UK: a prospective, longitudinal, cohort study. *Lancet Infect  
632 Dis.* 2022;22: 183–195. doi:10.1016/S1473-3099(21)00648-4
- 633 7. Kissler SM, Fauver JR, Mack C, Tai CG, Breban MI, Watkins AE, et al. Viral Dynamics of SARS-  
634 CoV-2 Variants in Vaccinated and Unvaccinated Persons. *N Engl J Med.* 2021;385: 2489–2491.  
635 doi:10.1056/NEJMc2102507
- 636 8. Puhach O, Adea K, Hulo N, Sattoune P, Genecand C, Iten A, et al. Infectious viral load in  
637 unvaccinated and vaccinated individuals infected with ancestral, Delta or Omicron SARS-CoV-2.  
638 *Nat Med.* 2022;28: 1491–1500. doi:10.1038/s41591-022-01816-0
- 639 9. Boucau J, Marino C, Regan J, Uddin R, Choudhary MC, Flynn JP, et al. Duration of Shedding of  
640 Culturable Virus in SARS-CoV-2 Omicron (BA.1) Infection. *N Engl J Med.* 2022;387: 275–277.  
641 doi:10.1056/NEJMc2202092
- 642 10. Hay JA, Kennedy-Shaffer L, Kanjilal S, Lennon NJ, Gabriel SB, Lipsitch M, et al. Estimating  
643 epidemiologic dynamics from cross-sectional viral load distributions. *Science.* 2021;373.  
644 doi:10.1126/science.abh0635
- 645 11. Fryer HR, Golubchik T, Hall M, Fraser C, Hinch R, Ferretti L, et al. Viral burden is associated with  
646 age, vaccination, and viral variant in a population-representative study of SARS-CoV-2 that  
647 accounts for time-since-infection-related sampling bias. *PLoS Pathog.* 2023;19: e1011461.  
648 doi:10.1371/journal.ppat.1011461
- 649 12. Duesterwald L, Nguyen M, Christensen P, Wesley Long S, Olsen RJ, Musser JM, et al. Using  
650 Genome Sequence Data to Predict SARS-CoV-2 Detection Cycle Threshold Values.  
651 doi:10.1101/2022.11.14.22282297
- 652 13. Uffelmann E, Huang QQ, Munung NS, de Vries J, Okada Y, Martin AR, et al. Genome-wide  
653 association studies. *Nature Reviews Methods Primers.* 2021;1: 1–21. doi:10.1038/s43586-021-  
654 00056-9
- 655 14. McLaren PJ, Porreca I, Iaconis G, Mok HP, Mukhopadhyay S, Karakoc E, et al. Africa-specific

- 656 human genetic variation near CHD1L associates with HIV-1 load. *Nature*. 2023;620: 1025–1030.  
657 doi:10.1038/s41586-023-06370-4
- 658 15. Karim M, Dunham I, Ghoussaini M. Mining a GWAS of Severe Covid-19. *The New England*  
659 *journal of medicine*. 2020. pp. 2588–2589. doi:10.1056/NEJMc2025747
- 660 16. Roberts GHL, Partha R, Rhead B, Knight SC, Park DS, Coignet MV, et al. Expanded COVID-19  
661 phenotype definitions reveal distinct patterns of genetic association and protective effects. *Nat*  
662 *Genet*. 2022;54: 374–381. doi:10.1038/s41588-022-01042-x
- 663 17. Genomewide Association Study of Severe Covid-19 with Respiratory Failure. *N Engl J Med*.  
664 2020;383: 1522–1534. doi:10.1056/NEJMoa2020283
- 665 18. Power RA, Parkhill J, de Oliveira T. Microbial genome-wide association studies: lessons from  
666 human GWAS. *Nat Rev Genet*. 2017;18: 41–50. doi:10.1038/nrg.2016.132
- 667 19. Power RA, Davaniah S, Derache A, Wilkinson E, Tanser F, Gupta RK, et al. Genome-Wide  
668 Association Study of HIV Whole Genome Sequences Validated using Drug Resistance. *PLoS*  
669 *One*. 2016;11: e0163746. doi:10.1371/journal.pone.0163746
- 670 20. Ansari MA, Pedergrana V, L C Ip C, Magri A, Von Delft A, Bonsall D, et al. Genome-to-genome  
671 analysis highlights the effect of the human innate and adaptive immune systems on the hepatitis  
672 C virus. *Nat Genet*. 2017;49: 666–673. doi:10.1038/ng.3835
- 673 21. Vogels CBF, Breban MI, Ott IM, Alpert T, Petrone ME, Watkins AE, et al. Multiplex qPCR  
674 discriminates variants of concern to enhance global surveillance of SARS-CoV-2. *PLoS Biol*.  
675 2021;19: e3001236. doi:10.1371/journal.pbio.3001236
- 676 22. Zhou C, Zhang T, Ren H, Sun S, Yu X, Sheng J, et al. Impact of age on duration of viral RNA  
677 shedding in patients with COVID-19. *Aging*. 2020;12: 22399–22404. doi:10.18632/aging.104114
- 678 23. Acharya CB, Schrom J, Mitchell AM, Coil DA, Marquez C, Rojas S, et al. Viral Load Among  
679 Vaccinated and Unvaccinated, Asymptomatic and Symptomatic Persons Infected With the  
680 SARS-CoV-2 Delta Variant. *Open Forum Infect Dis*. 2022;9: ofac135. doi:10.1093/ofid/ofac135
- 681 24. Torgerson WS. Multidimensional scaling: I. Theory and method. *Psychometrika*. 1952;17: 401–  
682 419. doi:10.1007/bf02288916
- 683 25. VanderWeele TJ, Mathur MB. SOME DESIRABLE PROPERTIES OF THE BONFERRONI  
684 CORRECTION: IS THE BONFERRONI CORRECTION REALLY SO BAD? *Am J Epidemiol*.  
685 2018;188: 617–618. doi:10.1093/aje/kwy250
- 686 26. Ward IL, Bermingham C, Ayoubkhani D, Gethings OJ, Pouwels KB, Yates T, et al. Risk of covid-  
687 19 related deaths for SARS-CoV-2 omicron (B.1.1.529) compared with delta (B.1.617.2):  
688 retrospective cohort study. *BMJ*. 2022;378: e070695. doi:10.1136/bmj-2022-070695
- 689 27. Volz E, Hill V, McCrone JT, Price A, Jorgensen D, O’Toole Á, et al. Evaluating the Effects of  
690 SARS-CoV-2 Spike Mutation D614G on Transmissibility and Pathogenicity. *Cell*. 2021;184: 64–  
691 75.e11. doi:10.1016/j.cell.2020.11.020
- 692 28. Tian D, Sun Y, Zhou J, Ye Q. The Global Epidemic of the SARS-CoV-2 Delta Variant, Key Spike  
693 Mutations and Immune Escape. *Front Immunol*. 2021;12: 751778.  
694 doi:10.3389/fimmu.2021.751778
- 695 29. Hodcroft EB, Domman DB, Snyder DJ, Oguntuyo KY, Van Diest M, Densmore KH, et al.  
696 Emergence in late 2020 of multiple lineages of SARS-CoV-2 Spike protein variants affecting  
697 amino acid position 677. *medRxiv*. 2021. doi:10.1101/2021.02.12.21251658
- 698 30. Cosar B, Karagulleoglu ZY, Unal S, Ince AT, Uncuoglu DB, Tuncer G, et al. SARS-CoV-2  
699 Mutations and their Viral Variants. *Cytokine Growth Factor Rev*. 2022;63: 10–22.  
700 doi:10.1016/j.cytogfr.2021.06.001

- 701 31. Chen J, Wang R, Wang M, Wei G-W. Mutations Strengthened SARS-CoV-2 Infectivity. *J Mol*  
702 *Biol.* 2020;432: 5212–5226. doi:10.1016/j.jmb.2020.07.009
- 703 32. Harvey WT, Carabelli AM, Jackson B, Gupta RK, Thomson EC, Harrison EM, et al. SARS-CoV-2  
704 variants, spike mutations and immune escape. *Nat Rev Microbiol.* 2021;19: 409–424.  
705 doi:10.1038/s41579-021-00573-0
- 706 33. Gangavarapu K, Latif AA, Mullen JL, Alkuzweny M, Hufbauer E, Tsueng G, et al. Outbreak.info  
707 genomic reports: scalable and dynamic surveillance of SARS-CoV-2 variants and mutations. *Nat*  
708 *Methods.* 2023;20: 512–522. doi:10.1038/s41592-023-01769-3
- 709 34. Tang X, Wu C, Li X, Song Y, Yao X, Wu X, et al. On the origin and continuing evolution of SARS-  
710 CoV-2. *Natl Sci Rev.* 2020;7: 1012–1023. doi:10.1093/nsr/nwaa036
- 711 35. Carabelli AM, Peacock TP, Thorne LG, Harvey WT, Hughes J, COVID-19 Genomics UK  
712 Consortium, et al. SARS-CoV-2 variant biology: immune escape, transmission and fitness. *Nat*  
713 *Rev Microbiol.* 2023;21: 162–177. doi:10.1038/s41579-022-00841-7
- 714 36. Souza PFN, Mesquita FP, Amaral JL, Landim PGC, Lima KRP, Costa MB, et al. The spike  
715 glycoprotein of SARS-CoV-2: A review of how mutations of spike glycoproteins have driven the  
716 emergence of variants with high transmissibility and immune escape. *Int J Biol Macromol.*  
717 2022;208: 105–125. doi:10.1016/j.ijbiomac.2022.03.058
- 718 37. Kimura I, Kosugi Y, Wu J, Zahradnik J, Yamasoba D, Butlertanaka EP, et al. The SARS-CoV-2  
719 Lambda variant exhibits enhanced infectivity and immune resistance. *Cell Rep.* 2022;38:  
720 110218. doi:10.1016/j.celrep.2021.110218
- 721 38. Yadav PD, Bergeron É, Flora MS. Emerging SARS-COV-2 Variants: Genomic Variations,  
722 Transmission, Pathogenesis, Clinical Impact and Interventions. *Frontiers Media SA;* 2023.  
723 Available: <https://play.google.com/store/books/details?id=AHi6EAAAQBAJ>
- 724 39. BMvd V, Dingemans J, Bank LE, von Wintersdorff CJ. Viral load dynamics in healthcare workers  
725 with COVID-19 during Delta and Omicron era. [cited 10 Feb 2024]. Available:  
726 <https://europepmc.org/article/ppr/ppr485029>
- 727 40. Lentini A, Pereira A, Winqvist O, Reinius B. Monitoring of the SARS-CoV-2 Omicron BA.1/BA.2  
728 variant transition in the Swedish population reveals higher viral quantity in BA.2 cases. *bioRxiv.*  
729 2022. doi:10.1101/2022.03.26.22272984
- 730 41. Russell TW, Townsley H, Abbott S, Hellewell J, Carr EJ, Chapman LAC, et al. Combined  
731 analyses of within-host SARS-CoV-2 viral kinetics and information on past exposures to the  
732 virus in a human cohort identifies intrinsic differences of Omicron and Delta variants. *PLoS Biol.*  
733 2024;22: e3002463. doi:10.1371/journal.pbio.3002463
- 734 42. Kopsidas I, Karagiannidou S, Kostaki EG, Kousi D, Douka E, Sfrikakis PP, et al. Global  
735 Distribution, Dispersal Patterns, and Trend of Several Omicron Subvariants of SARS-CoV-2  
736 across the Globe. *Trop Med Infect Dis.* 2022;7. doi:10.3390/tropicalmed7110373
- 737 43. Motozono C, Toyoda M, Tan TS, Hamana H, Goto Y, Aritsu Y, et al. The SARS-CoV-2 Omicron  
738 BA.1 spike G446S mutation potentiates antiviral T-cell recognition. *Nat Commun.* 2022;13:  
739 5440. doi:10.1038/s41467-022-33068-4
- 740 44. Lin X, Sha Z, Trimpert J, Kunec D, Jiang C, Xiong Y, et al. The NSP4 T492I mutation increases  
741 SARS-CoV-2 infectivity by altering non-structural protein cleavage. *Cell Host Microbe.* 2023;31:  
742 1170–1184.e7. doi:10.1016/j.chom.2023.06.002
- 743 45. Luo CH, Morris CP, Sachithanandham J, Amadi A, Gaston D, Li M, et al. Infection with the  
744 SARS-CoV-2 Delta Variant is Associated with Higher Infectious Virus Loads Compared to the  
745 Alpha Variant in both Unvaccinated and Vaccinated Individuals. *medRxiv.* 2021.  
746 doi:10.1101/2021.08.15.21262077

- 747 46. von Wintersdorff CJH, Dingemans J, van Alphen LB, Wolffs PFG, van der Veer BMJW, Hoebe  
748 CJPA, et al. Infections with the SARS-CoV-2 Delta variant exhibit fourfold increased viral loads  
749 in the upper airways compared to Alpha or non-variants of concern. *Sci Rep.* 2022;12: 13922.  
750 doi:10.1038/s41598-022-18279-5
- 751 47. Li B, Deng A, Li K, Hu Y, Li Z, Shi Y, et al. Viral infection and transmission in a large, well-traced  
752 outbreak caused by the SARS-CoV-2 Delta variant. *Nat Commun.* 2022;13: 460.  
753 doi:10.1038/s41467-022-28089-y
- 754 48. Fall A, Eldesouki RE, Sachithanandham J, Morris CP, Norton JM, Gaston DC, et al. The  
755 displacement of the SARS-CoV-2 variant Delta with Omicron: An investigation of hospital  
756 admissions and upper respiratory viral loads. *EBioMedicine.* 2022;79: 104008.  
757 doi:10.1016/j.ebiom.2022.104008
- 758 49. Hay JA, Kissler SM, Fauver JR, Mack C, Tai CG, Samant RM, et al. Quantifying the impact of  
759 immune history and variant on SARS-CoV-2 viral kinetics and infection rebound: A retrospective  
760 cohort study. *Elife.* 2022;11. doi:10.7554/eLife.81849
- 761 50. Jones RP, Ponomarenko A. COVID-19-Related Age Profiles for SARS-CoV-2 Variants in England  
762 and Wales and States of the USA (2020 to 2022): Impact on All-Cause Mortality. *Infect Dis Rep.*  
763 2023;15: 600–634. doi:10.3390/idr15050058
- 764 51. Bartha I, Carlson JM, Brumme CJ, McLaren PJ, Brumme ZL, John M, et al. A genome-to-  
765 genome analysis of associations between human genetic variation, HIV-1 sequence diversity,  
766 and viral control. *Elife.* 2013;2: e01123. doi:10.7554/eLife.01123
- 767 52. Lu X, Wang L, Sakthivel SK, Whitaker B, Murray J, Kamili S, et al. US CDC Real-Time Reverse  
768 Transcription PCR Panel for Detection of Severe Acute Respiratory Syndrome Coronavirus 2.  
769 *Emerg Infect Dis.* 2020;26: 1654–1665. doi:10.3201/eid2608.201246
- 770 53. Vogels CBF, Brito AF, Wyllie AL, Fauver JR, Ott IM, Kalinich CC, et al. Analytical sensitivity and  
771 efficiency comparisons of SARS-CoV-2 RT-qPCR primer-probe sets. *Nature Microbiology.*  
772 2020;5: 1299–1305. doi:10.1038/s41564-020-0761-6
- 773 54. Li H. Aligning sequence reads, clone sequences and assembly contigs with BWA-MEM. *arXiv*  
774 [q-bio.GN]. 2013. Available: <http://arxiv.org/abs/1303.3997>
- 775 55. Grubaugh ND, Gangavarapu K, Quick J, Matteson NL, De Jesus JG, Main BJ, et al. An  
776 amplicon-based sequencing framework for accurately measuring intrahost virus diversity using  
777 PrimalSeq and iVar. *Genome Biol.* 2019;20: 8. doi:10.1186/s13059-018-1618-7
- 778 56. Danecek P, Bonfield JK, Liddle J, Marshall J, Ohan V, Pollard MO, et al. Twelve years of  
779 SAMtools and BCFtools. *Gigascience.* 2021;10. doi:10.1093/gigascience/giab008
- 780 57. O'Toole Á, Scher E, Underwood A, Jackson B, Hill V, McCrone JT, et al. Assignment of  
781 epidemiological lineages in an emerging pandemic using the pangolin tool. *Virus Evol.* 2021;7:  
782 veab064. doi:10.1093/ve/veab064
- 783 58. Aksamentov I, Roemer C, Hodcroft E, Neher R. Nextclade: clade assignment, mutation calling  
784 and quality control for viral genomes. *J Open Source Softw.* 2021;6: 3773.  
785 doi:10.21105/joss.03773
- 786 59. Page AJ, Taylor B, Delaney AJ, Soares J, Seemann T, Keane JA, et al. SNP-sites: rapid efficient  
787 extraction of SNPs from multi-FASTA alignments. *Microb Genom.* 2016;2: e000056.  
788 doi:10.1099/mgen.0.000056
- 789 60. Creators Seemann, Torsten1 Show affiliations 1. The University of Melbourne. Source code for  
790 snp-dists software. doi:10.5281/zenodo.1411986
- 791 61. Minh BQ, Schmidt HA, Chernomor O, Schrempf D, Woodhams MD, von Haeseler A, et al.

792 Corrigendum to: IQ-TREE 2: New Models and Efficient Methods for Phylogenetic Inference in  
793 the Genomic Era. *Mol Biol Evol.* 2020;37: 2461. doi:10.1093/molbev/msaa131

794

795

## 796 Supplementary Figures & Tables

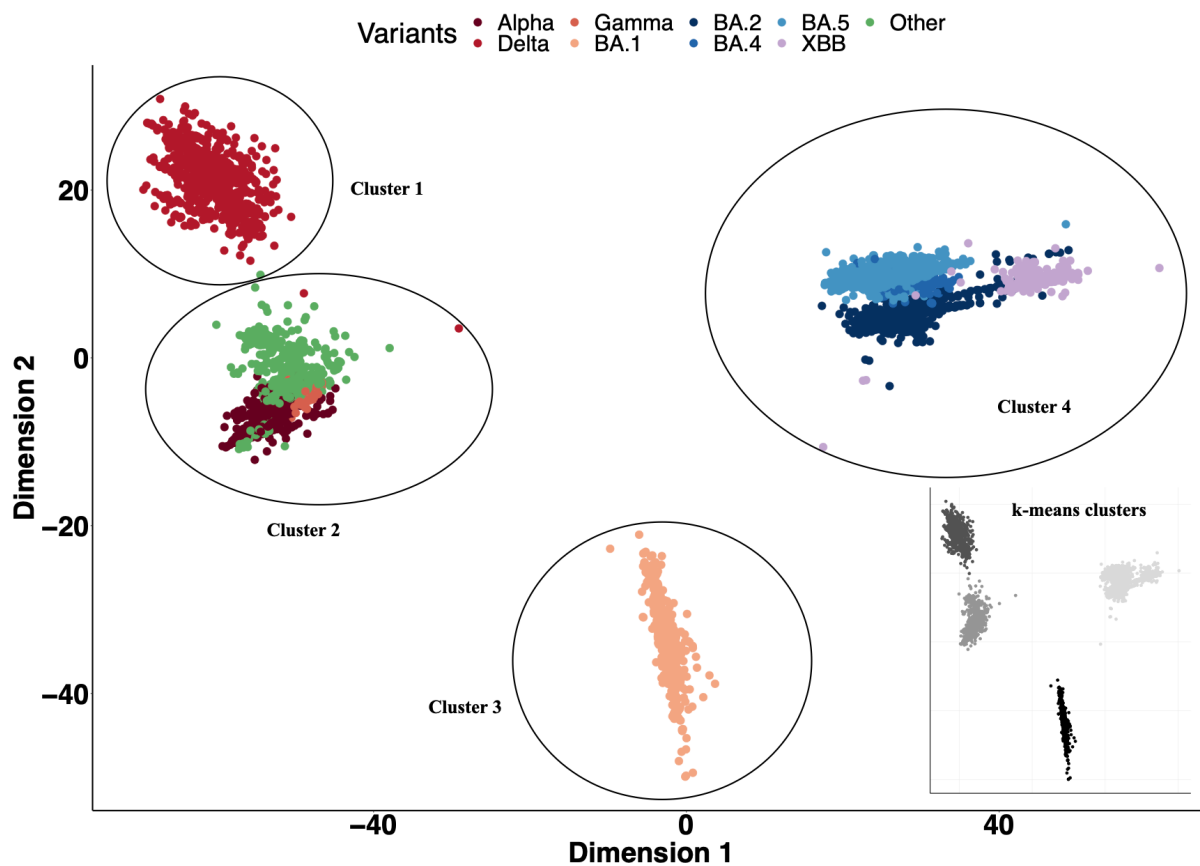

797  
798  
799  
800  
801  
802

**Supplements Figure 1. Results of multidimensional scaling.** The population structure of the 9902 genome sequences using a multidimensional scaling (MDS) method. Clusters are defined using a *k*-means clustering method, as shown on the bottom right corner.

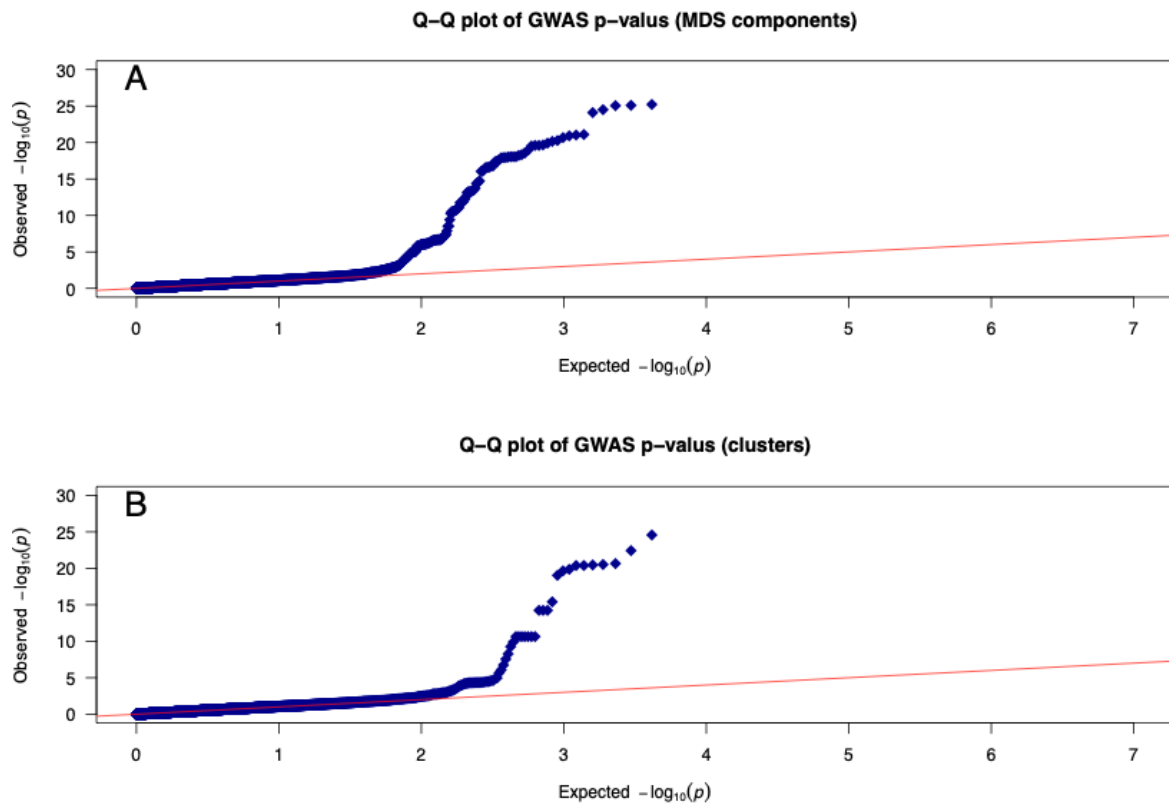

803  
804  
805  
806  
807  
808  
809  
810  
811  
812  
813  
814  
815  
816  
817  
818  
819

**Supplements Figure 2. Q-Q plots of GWAS p-values.** Q-Q plots (quantile-quantile plots) showing the p-values from GWAS analysis using (A) two MDS-computed components, or (B) MDS-inferred four clusters as covariates in the regression model.



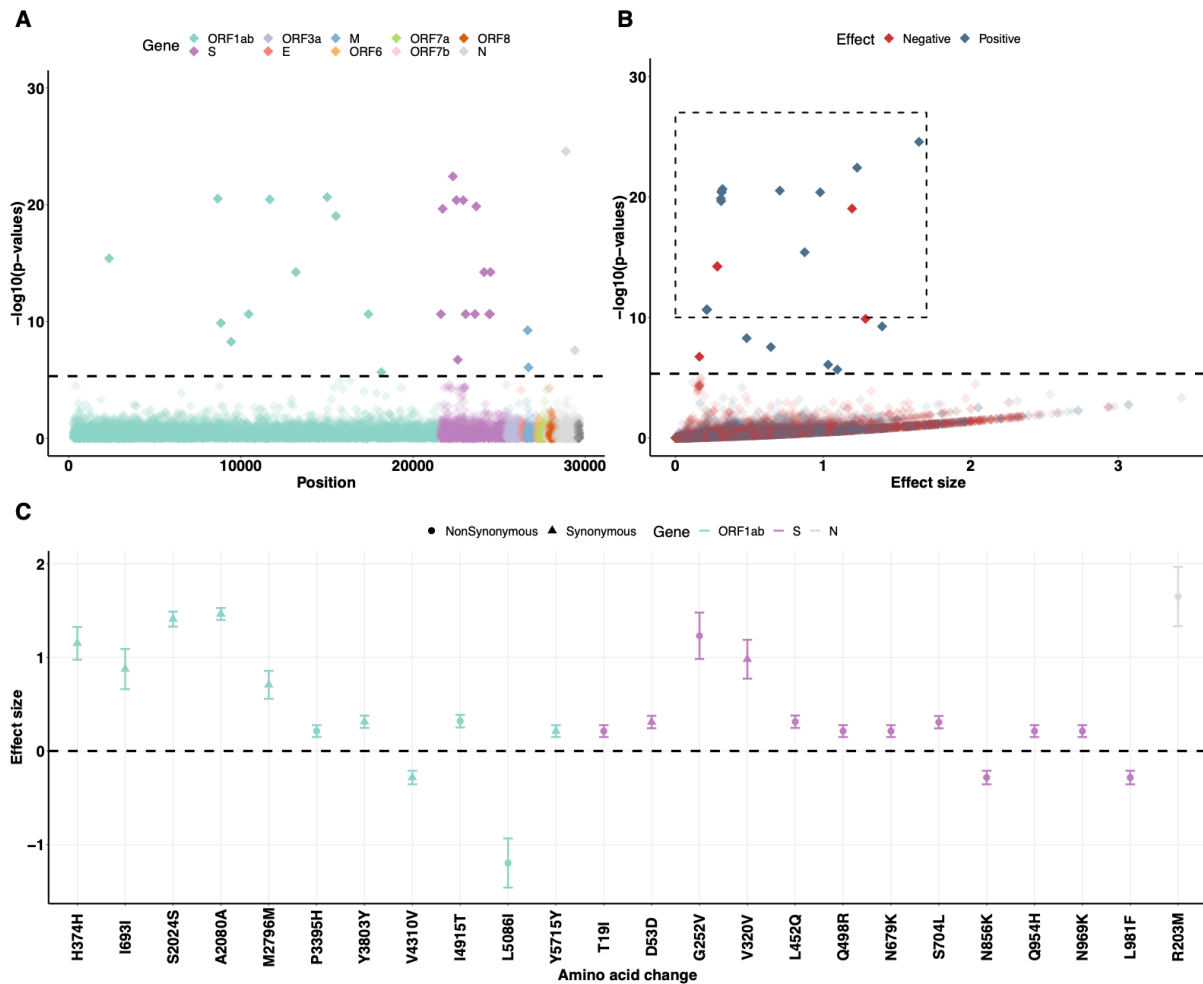

820  
821  
822  
823  
824  
825  
826  
827  
828  
829  
830

**Supplemental Figure 3. GWAS analysis using the four clusters (shown in Fig. S1) as covariates for population control. (A)** Genome-wide association results of the impact of identified SNPs on viral copies during SARS-CoV-2 infection. The dashed line indicates the permuted threshold for genome-wide significance  $p = 4.67 \times 10^{-6}$  ( $0.05/10697$  SNPs). Significant SNPs are shown with solid colors. **(B)** SNPs (with  $p < 1 \times 10^{-10}$ ) that have positive (blue) or negative (red) effects on viral copies. **(C)** The corresponding synonymous (triangles) and non-synonymous (circles) amino acid changes that associate with increased or decreased viral copies. Data shown as means with 95% confidence intervals. The estimated effective sizes and associated standard deviations are given **Table S2**.

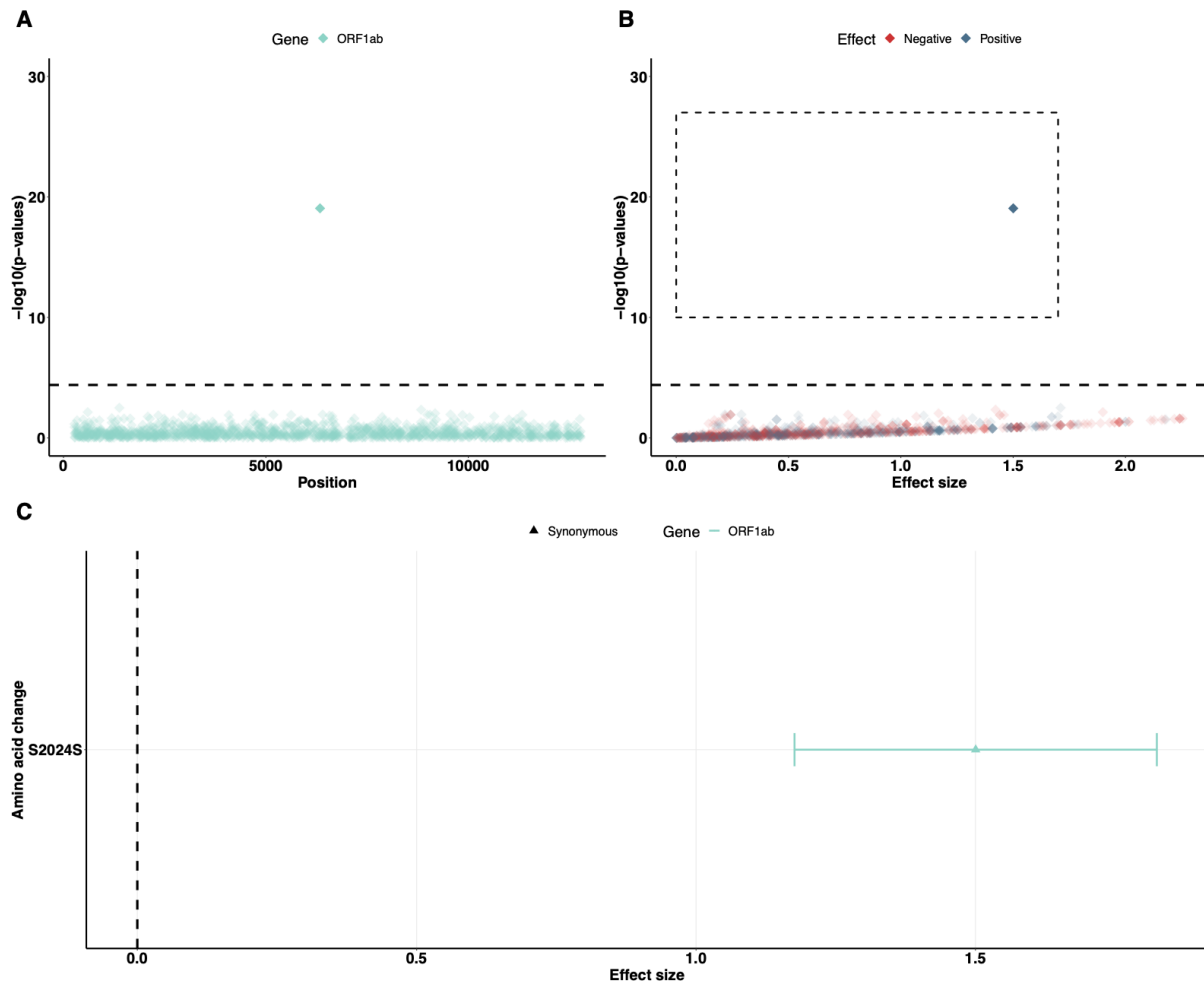

831  
832  
833  
834  
835  
836  
837  
838  
839

**Supplemental Figure 4. GWAS analysis using only Cluster 1 data (shown in Fig. S1).** (A) Genome-wide association results of the impact of identified SNPs on viral copies during SARS-CoV-2 infection. The dashed line indicates the permuted threshold for genome-wide significance  $p = 4.03 \times 10^{-5}$  (0.05/1242 SNPs). Significant SNPs are shown with solid colors. (B) SNPs (with  $p < 1 \times 10^{-10}$ ) that have positive (blue) or negative (red) effects on viral copies. (C) The corresponding synonymous (triangles) amino acid changes that associate with increased or decreased viral copies. Data shown as means with 95% confidence intervals.

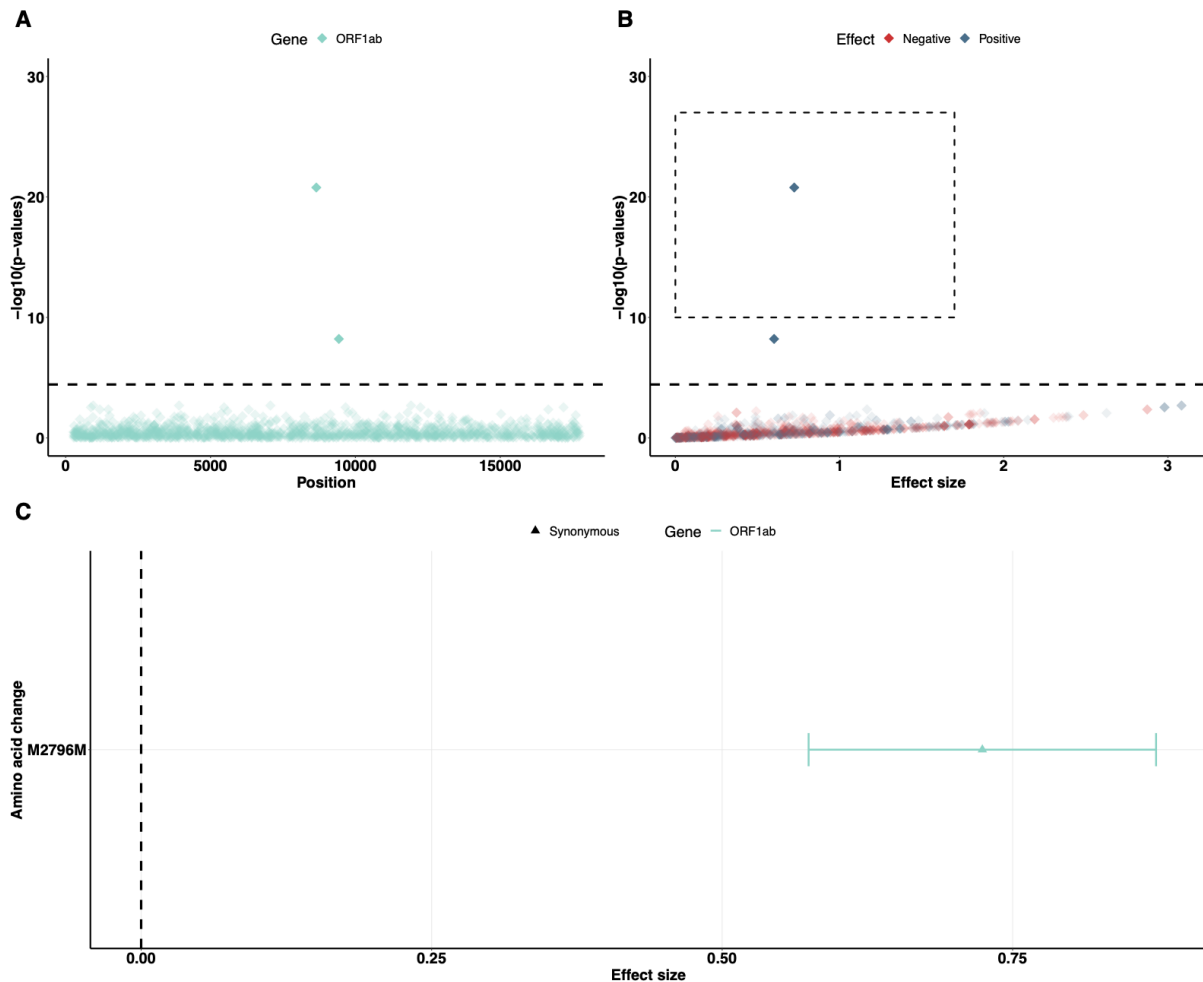

840  
841  
842  
843  
844  
845  
846  
847  
848  
849  
850

**Supplemental Figure 5. GWAS analysis using Cluster 2 data (shown in Fig. S1).** (A) Genome-wide association results of the impact of identified SNPs on viral copies during SARS-CoV-2 infection. The dashed line indicates the permuted threshold for genome-wide significance  $p = 3.68 \times 10^{-5}$  (0.05/1357 SNPs). Significant SNPs are shown with solid colors. (B) SNPs (with  $p < 1 \times 10^{-10}$ ) that have positive (blue) or negative (red) effects on viral copies. (C) The corresponding synonymous (triangles) amino acid changes that associate with increased or decreased viral copies. Data shown as means with 95% confidence intervals.

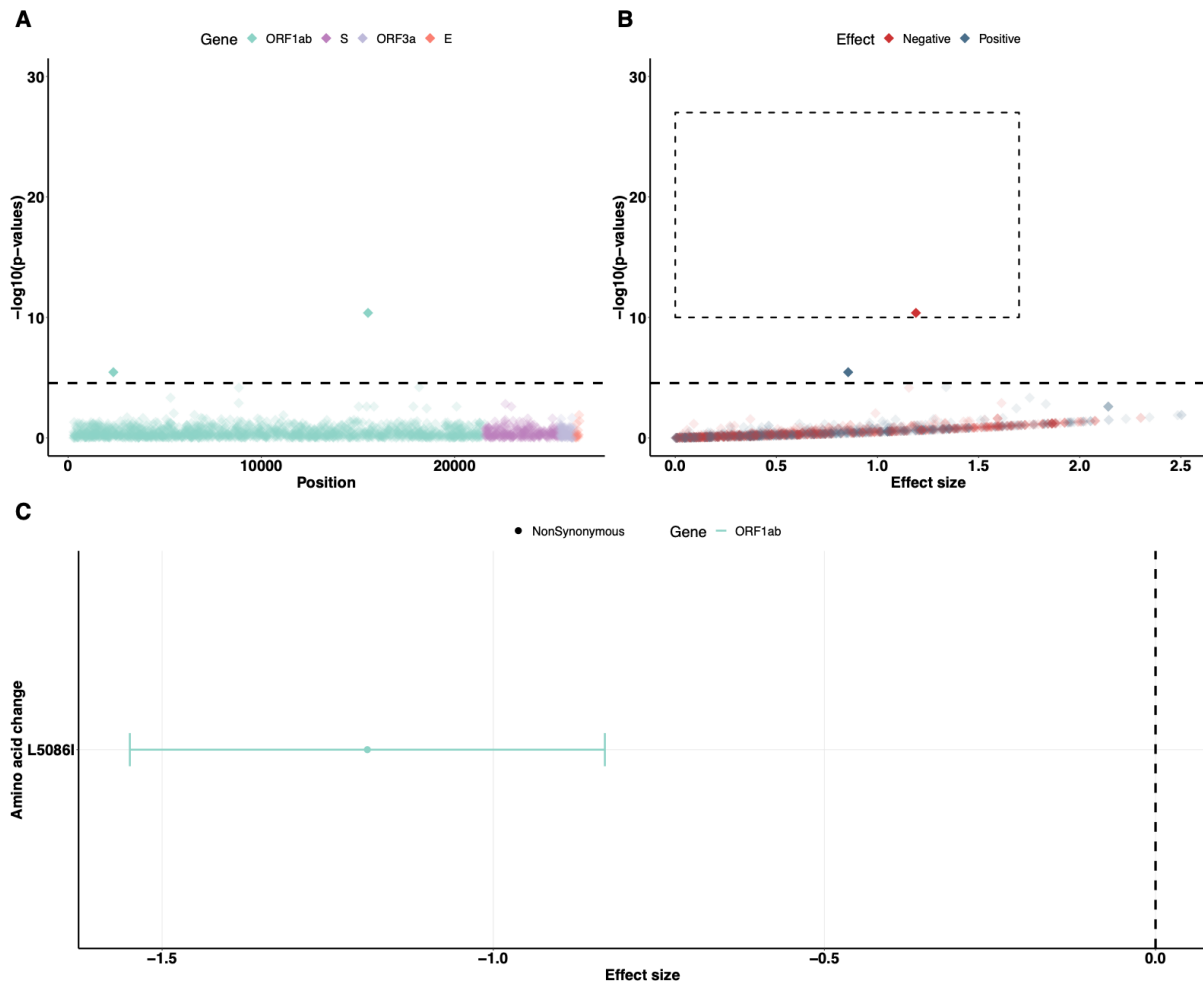

851  
852 **Supplemental Figure 6. GWAS analysis using Cluster 3 data (shown in Fig. S1).** (A) Genome-wide  
853 association results of the impact of identified SNPs on viral copies during SARS-CoV-2 infection. The  
854 dashed line indicates the permuted threshold for genome-wide significance  $p = 2.80 \times 10^{-5}$  (0.05/1784  
855 SNPs). Significant SNPs are shown with solid colors. (B) SNPs (with  $p < 1 \times 10^{-10}$ ) that have positive  
856 (blue) or negative (red) effects on viral copies. (C) The corresponding non-synonymous (circles) amino  
857 acid changes that associate with increased or decreased viral copies. Data shown as means with 95%  
858 confidence intervals.

859  
860  
861  
862  
863

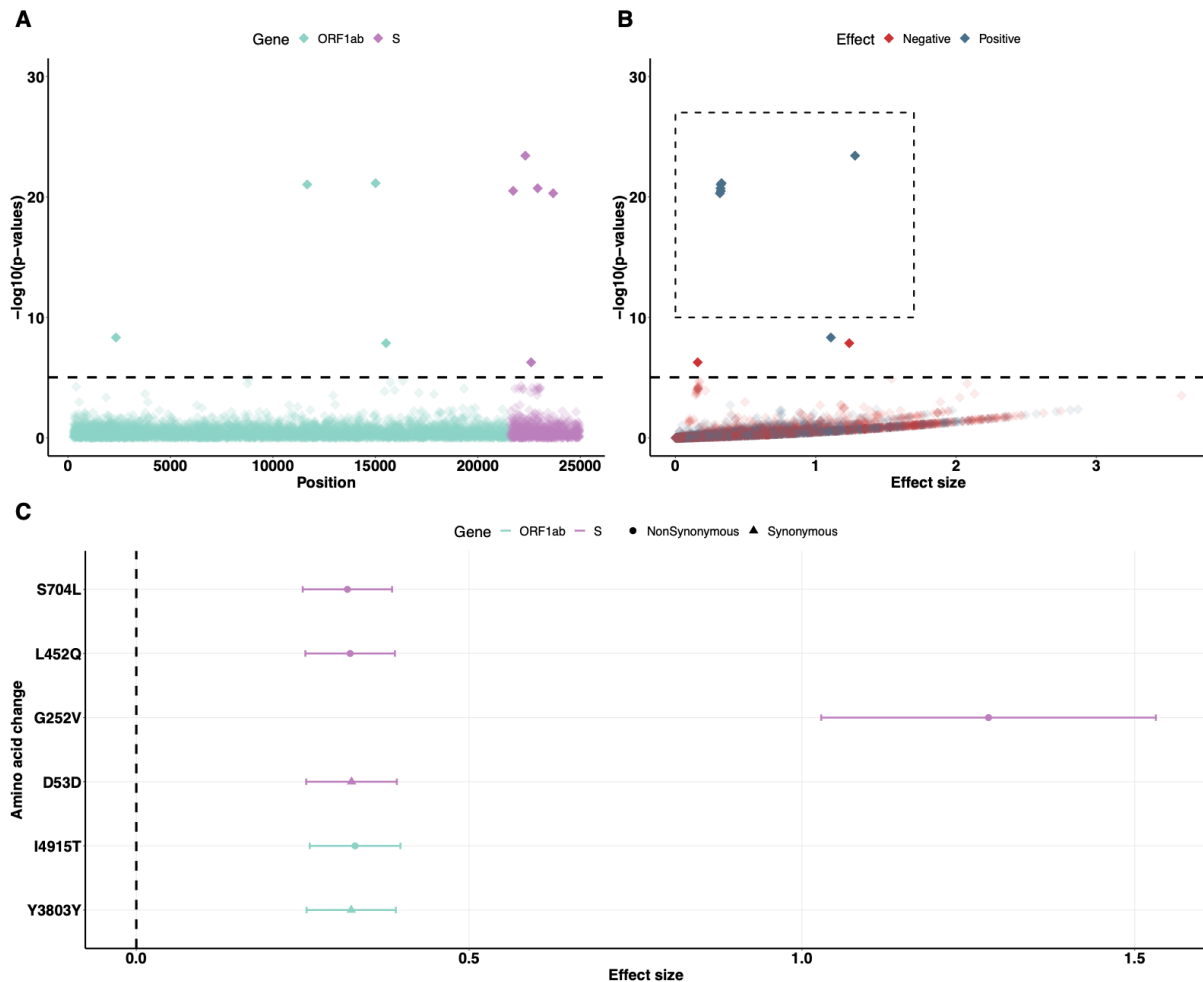

864  
865  
866  
867  
868  
869  
870  
871  
872  
873  
874  
875  
876

**Supplemental Figure 7. GWAS analysis using Cluster 4 data (shown in Fig. S1).** (A) Genome-wide association results of the impact of identified SNPs on viral copies during SARS-CoV-2 infection. The dashed line indicates the permuted threshold for genome-wide significance  $p = 7.91 \times 10^{-6}$  (0.05/6314 SNPs). Significant SNPs are shown with solid colors. (B) SNPs (with  $p < 1 \times 10^{-10}$ ) that have positive (blue) or negative (red) effects on viral copies. (C) The corresponding synonymous (triangles) and non-synonymous (circles) amino acid changes that associate with increased or decreased viral copies. Data shown as means with 95% confidence intervals.

877

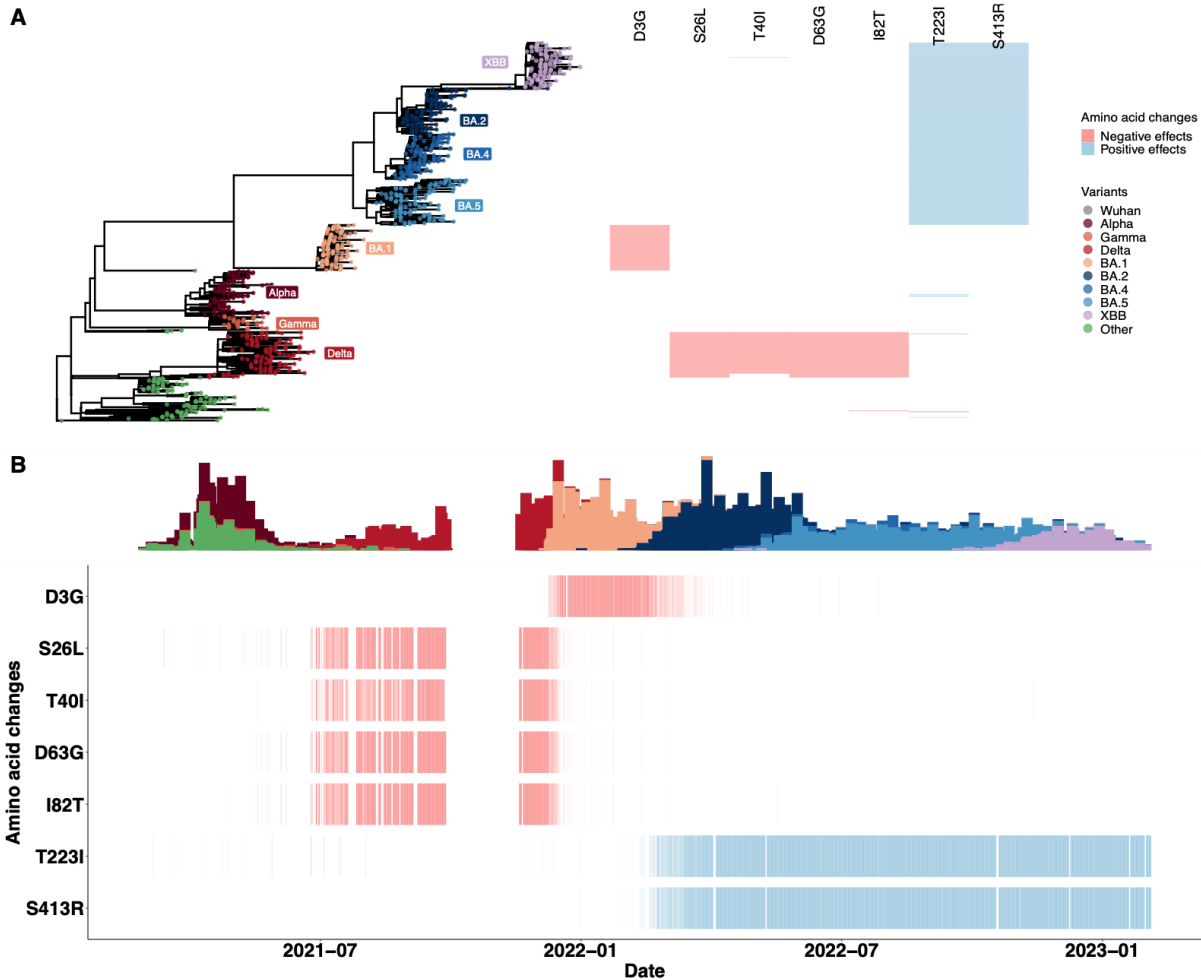

878

879

880

881

882

883

884

885

886

887

888

889

890

**Supplemental Figure 8. The temporal dynamics of amino acid changes in the ORF3a gene (S26L and T223I), M gene (D3G and I82T), ORF7b gene (T40I) and N gene (D63G and S413R) associated with changes in viral copies.** The results are based on the multivariate regression analysis using the two MDS components as covariates. **(A)** The phylogenetic tree estimated from a representative set of 996 genome sequences showing variant assignments and the locations of amino acid changes that increase (blue) or decrease (red) viral copies. **(B)** The temporal dynamics of the SNPs from February 2021 to March 2023. The transparency of the color corresponds to the mutation fraction in the daily sequence count: transparent color indicates low fractions, and opaque color indicates high fractions.

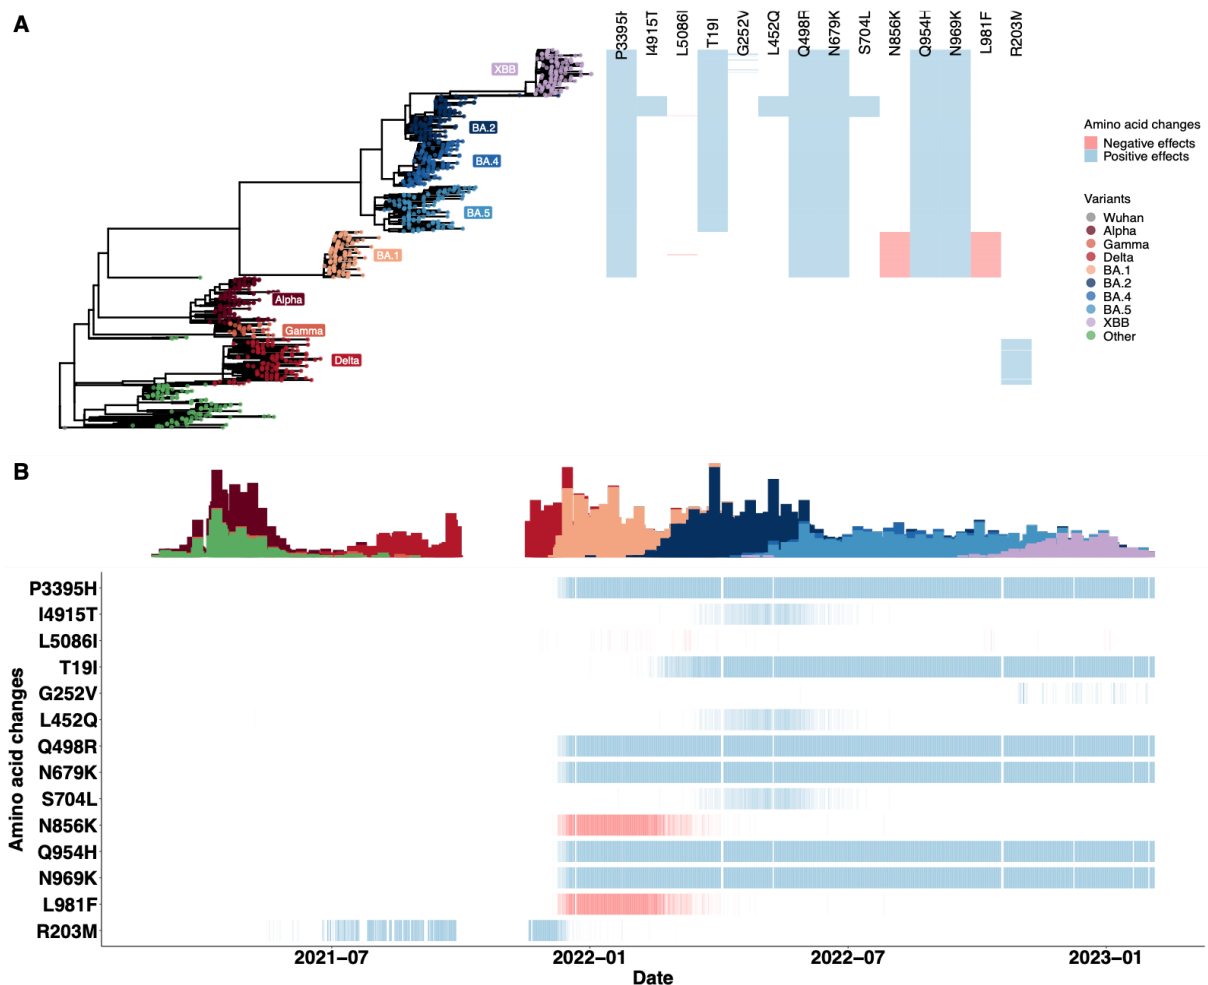

891  
892  
893  
894  
895  
896  
897  
898  
899  
900  
901  
902  
903  
904  
905

**Supplemental Figure 9. The temporal dynamics of amino acid changes in the ORF1ab gene (P3395H, I4915T and L5086I), S gene (T19I, G252V, L452Q, Q498R, N679K, S704L, N856K, Q954H, N969K and L981F), and N gene (R203M) associated with changes in viral copies.** The results are based on the multivariate regression analysis using the sequence clusters (i.e., a categorical variable) inferred from the MDS components, such that  $Y \sim \alpha W + \beta_i SNP_i + \eta Cluster + e$ . **(A)** The phylogenetic tree estimated from a representative set of 996 genome sequences showing variant assignments and the locations of amino acid changes that increase (blue) or decrease (red) viral copies. **(B)** The temporal dynamics of the SNPs from February 2021 to March 2023. The transparency of the color corresponds to the mutation fraction in the daily sequence count: transparent color indicates low fractions, and opaque color indicates high fractions.

| AminoAcidChange | coefficients | Standard deviation |
|-----------------|--------------|--------------------|
| D3G             | -0.5289821   | 0.06197068         |
| T19R            | -0.3583990   | 0.05236202         |
| T19I            | 0.8675393    | 0.09368981         |
| S26L            | -0.3470353   | 0.05215769         |
| T40I            | -0.3810594   | 0.05035466         |
| D63G            | -0.3508300   | 0.05236169         |
| A67V            | -0.5034788   | 0.06039024         |
| I82T            | -0.3456858   | 0.05196310         |
| S135R           | 0.8074352    | 0.09059436         |
| V213G           | 0.2323215    | 0.03223704         |
| T223I           | 0.5872878    | 0.08264916         |
| G252V           | 1.1976598    | 0.12468634         |
| S371L           | -0.5534597   | 0.06193220         |
| T376A           | 0.8620845    | 0.08999643         |
| D405N           | 0.8797794    | 0.09241162         |
| R408S           | 0.6207915    | 0.08287705         |
| S413R           | 0.8157651    | 0.09230739         |
| G446S           | -0.2664795   | 0.03198609         |
| L452Q           | 0.3466409    | 0.03292778         |
| G496S           | -0.5499511   | 0.06210286         |
| T547K           | -0.5341148   | 0.06147332         |
| P681R           | -0.3506782   | 0.05225140         |
| S704L           | 0.3418159    | 0.03284982         |
| T842I           | 0.7544330    | 0.08850513         |
| N856K           | -0.5521347   | 0.06227279         |
| K856R           | -0.5393076   | 0.06198051         |
| D950N           | -0.3534498   | 0.05196289         |
| L981F           | -0.5521347   | 0.06227279         |
| A1306S          | -0.3553043   | 0.05035843         |
| G1307S          | 0.8259626    | 0.08905459         |



|     |        |            |            |
|-----|--------|------------|------------|
| 906 |        |            |            |
| 907 | P2287S | -0.3541119 | 0.05015436 |
| 908 | A2710T | -0.5450373 | 0.06223708 |
| 909 |        |            |            |
| 910 | V2857A | -1.3198257 | 0.20083279 |
| 911 | V2930L | -0.3796890 | 0.05042589 |
| 912 |        |            |            |
| 913 | L3027F | 0.8277260  | 0.08812009 |
| 914 | T3090I | 0.7634935  | 0.08992720 |
| 915 |        |            |            |
| 916 | T3255I | -0.2507549 | 0.03705032 |
| 917 |        |            |            |
| 918 | T3646A | -0.3687172 | 0.05037977 |
| 919 | I3758V | -0.5466932 | 0.06187469 |
| 920 |        |            |            |
| 921 | I4915T | 0.3524137  | 0.03336264 |
| 922 | L5086I | -1.2284741 | 0.13159986 |
| 923 |        |            |            |
| 924 | S5150F | 0.8465102  | 0.09162000 |
| 925 |        |            |            |
| 926 | H5401Y | -0.3689352 | 0.05186462 |
| 927 | K6597R | 0.8501061  | 0.09021831 |
| 928 |        |            |            |
| 929 |        |            |            |

930 **Supplemental Table 1. The identified amino acid changes associated estimated effective sizes**  
931 **and standard deviations using the multivariate linear regression model with MDS-computed**  
932 **dimensions as covariates.**

933  
934  
935  
936  
937  
938  
939  
940  
941  
942  
943  
944  
945  
946  
947  
948  
949  
950  
951

|     | AminoAcidChange | coefficients | Standard deviation |
|-----|-----------------|--------------|--------------------|
| 952 |                 |              |                    |
| 953 |                 |              |                    |
| 954 |                 |              |                    |
| 955 | T19I            | 0.2123842    | 0.03172457         |
| 956 |                 |              |                    |
| 957 | R203M           | 1.6492504    | 0.15825678         |
| 958 |                 |              |                    |
| 959 | G252V           | 1.2301542    | 0.12381144         |
| 960 |                 |              |                    |
| 961 | L452Q           | 0.3127277    | 0.03308999         |
| 962 |                 |              |                    |
| 963 | Q498R           | 0.2123842    | 0.03172457         |
| 964 |                 |              |                    |
| 965 | N679K           | 0.2123842    | 0.03172457         |
| 966 |                 |              |                    |
| 967 | S704L           | 0.3077803    | 0.03301503         |
| 968 |                 |              |                    |
| 969 | N856K           | -0.2832514   | 0.03621949         |
| 970 |                 |              |                    |
| 971 | Q954H           | 0.2123842    | 0.03172457         |
| 972 |                 |              |                    |
| 973 | N969K           | 0.2123842    | 0.03172457         |
| 974 |                 |              |                    |
| 975 | L981F           | -0.2832514   | 0.03621949         |
| 976 |                 |              |                    |
| 977 | P3395H          | 0.2123842    | 0.03172457         |
| 978 |                 |              |                    |
| 979 | I4915T          | 0.3189265    | 0.03351622         |
|     |                 |              |                    |
|     | L5086I          | -1.1958547   | 0.13116867         |

980 **Supplemental Table 2. The identified amino acid changes associated estimated effective sizes**  
981 **and standard deviations using the multivariate linear regression model with categorical clusters**  
982 **as covariates.**  
983  
984
